# Supplementary material for: Metabolomic Profiling in Neuromyelitis Optica Spectrum Disorder Biomarker Discovery
Source: MDPI journal article supplement (doi:10.3390/metabo10090374), 2020-09-18
Supplement: s1 [file s1]

**Supplementary Table 3. Sera Outcomes in Targeted Immunoassay-based NMOSD Studies.**

| Endpoint           | Shift | NMOSD Cohort     |                  | Disease State at Biopsy <sup>a</sup> |                 | AQP4-Ab Serology |                 | Treatment <sup>b</sup>                                   | Control <sup>c</sup>                        | Ref.  |
|--------------------|-------|------------------|------------------|--------------------------------------|-----------------|------------------|-----------------|----------------------------------------------------------|---------------------------------------------|-------|
|                    |       | F                | M                | LAP                                  | REM             | +                | -               |                                                          |                                             |       |
| Activated factor B | ↔     | 22               | 6                | 28                                   | –               | 15               | 13              | –                                                        | 29 RRMS, 31 HC                              | (222) |
|                    | ↓     | 22               | 6                | 28                                   | –               | 15               | 13              | –                                                        | 30 Behçet's Disease                         | (222) |
| AMCase             | ↔     | 8                | 4                | 9                                    | 3               | NR               | NR              | –                                                        | 24 RRMS, 24 SPMS, 24 OIND, 24 HC            | (214) |
| AOPP               | ↑     | NR <sup>d</sup>  | NR <sup>d</sup>  | –                                    | 11              | NR               | NR              | –                                                        | 11 HC                                       | (261) |
| BAFF               | ↑     | 7                | 3                | 10                                   | –               | NR               | NR              | –                                                        | 10 RRMS, 10 ONND                            | (236) |
|                    | ↔     | 22               | 2                | –                                    | 24              | NR               | NR              | 7 GC, 2 AZA, 7 GC + AZA                                  | 20 RRMS, 22 HC                              | (266) |
| C3                 | ↑     | 24 <sup>e</sup>  | 1 <sup>e</sup>   | –                                    | ✓               | 25               | –               | NR                                                       | 54 MS <sup>f</sup>                          | (224) |
|                    | ↔     | 24 <sup>e</sup>  | 1 <sup>e</sup>   | –                                    | ✓               | 25               | –               | NR                                                       | 39 OSMS <sup>f</sup>                        | (224) |
|                    | ↔     | 24 <sup>e</sup>  | 1 <sup>e</sup>   | ✓                                    | –               | 25               | –               | NR                                                       | 54 MS <sup>f</sup> , 39 OSMS <sup>f</sup>   | (224) |
| C3a                | ↔     | 15               | –                | 15                                   | –               | 15               | –               | NR                                                       | 15 MS, 12 OND                               | (223) |
| C4                 | ↔     | 24 <sup>e</sup>  | 1 <sup>e</sup>   | –                                    | ✓               | 25               | –               | NR                                                       | 54 MS <sup>f</sup> , 39 OSMS <sup>f</sup>   | (224) |
|                    | ↔     | 24 <sup>e</sup>  | 1 <sup>e</sup>   | ✓                                    | –               | 25               | –               | NR                                                       | 54 MS <sup>f</sup> , 39 OSMS <sup>f</sup>   | (224) |
| C4a                | ↔     | 15               | –                | 15                                   | –               | 15               | –               | NR                                                       | 15 MS, 12 OND                               | (223) |
| C4d                | ↑     | 22               | 6                | 28                                   | –               | 15               | 13              | –                                                        | 29 RRMS, 31 HC                              | (222) |
|                    | ↔     | 22               | 6                | 28                                   | –               | 15               | 13              | –                                                        | 30 Behçet's Disease                         | (222) |
|                    | ↔     | 15               | –                | 15                                   | –               | 15               | –               | NR                                                       | 15 MS, 12 OND                               | (223) |
| C5a                | ↔     | 15               | –                | 15                                   | –               | 15               | –               | NR                                                       | 15 MS, 12 OND                               | (223) |
| C5b-9              | ↑     | 22               | 6                | 28                                   | –               | 15               | 13              | –                                                        | 29 RRMS, 31 HC                              | (222) |
|                    | ↓     | 22               | 6                | 28                                   | –               | 15               | 13              | –                                                        | 30 Behçet's Disease                         | (222) |
| Catalase           | ↑     | NR <sup>d</sup>  | NR <sup>d</sup>  | –                                    | 11              | NR               | NR              | –                                                        | 11 HC                                       | (261) |
| CCL2               | ↔     | 13               | –                | 13                                   | –               | NR               | NR              | –                                                        | 17 MS, 15 ONND                              | (244) |
| CCL4               | ↔     | 2                | 17               | –                                    | 19              | 19               | –               | 12 AZA, 13 PRN, 2 MMF, 1 CP, 1 RTX, 1 MTO                | 10 MS                                       | (258) |
| CCL11              | ↑     | 4 <sup>g</sup>   | 2 <sup>g</sup>   | –                                    | 6               | 4                | 2               | 2 Azathioprine, 1 Copaxone, 1 Interferon-β               | 10 NMOSD without LETM                       | (256) |
|                    | ↔     | 13               | –                | 13                                   | –               | NR               | NR              | –                                                        | 17 MS, 15 ONND                              | (244) |
|                    | ↔     | 2                | 17               | –                                    | 19              | 19               | –               | 12 AZA, 13 PRN, 2 MMF, 1 CP, 1 RTX, 1 MTO                | 10 MS                                       | (258) |
| CCL17              | ↔     | 13               | –                | 13                                   | –               | NR               | NR              | –                                                        | 17 MS                                       | (244) |
|                    | ↓     | 13               | –                | 13                                   | –               | NR               | NR              | –                                                        | 15 ONND                                     | (244) |
| CH50               | ↑     | 24 <sup>e</sup>  | 1 <sup>e</sup>   | ✓                                    | –               | 25               | –               | NR                                                       | 54 MS <sup>f</sup> , 39 OSMS <sup>f</sup>   | (224) |
|                    | ↔     | 24 <sup>e</sup>  | 1 <sup>e</sup>   | –                                    | ✓               | 25               | –               | NR                                                       | 54 MS <sup>f</sup> , 39 OSMS <sup>f</sup>   | (224) |
| CHI3LI             | ↔     | 8                | 4                | 9                                    | 3               | NR               | NR              | –                                                        | 24 RRMS, 24 SPMS, 24 OIND, 24 HC            | (214) |
| ChT                | ↔     | 8                | 4                | 9                                    | 3               | NR               | NR              | –                                                        | 24 RRMS, 24 SPMS, 24 OIND, 24 HC            | (214) |
| CRP                | ↔     | 24 <sup>e</sup>  | 1 <sup>e</sup>   | –                                    | ✓               | 25               | –               | NR                                                       | 54 MS <sup>f</sup> , 39 OSMS <sup>f</sup>   | (224) |
|                    | ↔     | 24 <sup>e</sup>  | 1 <sup>e</sup>   | ✓                                    | –               | 25               | –               | NR                                                       | 54 MS <sup>f</sup> , 39 OSMS <sup>f</sup>   | (224) |
| CXCL1              | ↑     | NR <sup>gh</sup> | NR <sup>gh</sup> | NR <sup>h</sup>                      | NR <sup>h</sup> | NR <sup>h</sup>  | NR <sup>h</sup> | NR <sup>h</sup>                                          | 10 RRMS                                     | (256) |
| CXCL5              | ↑     | 4 <sup>g</sup>   | 2 <sup>g</sup>   | –                                    | 6               | 4                | 2               | 2 Azathioprine, 1 Copaxone, 1 Interferon-β               | 10 NMOSD without LETM                       | (256) |
|                    | ↑     | NR <sup>gh</sup> | NR <sup>gh</sup> | NR <sup>h</sup>                      | NR <sup>h</sup> | NR <sup>h</sup>  | NR <sup>h</sup> | NR <sup>h</sup>                                          | 10 RRMS                                     | (256) |
|                    | ↑     | 23               | 2                | –                                    | 25              | NR               | NR              | NR                                                       | 25 MS, 20 HC                                | (259) |
| CXCL8              | ↑     | 4 <sup>g</sup>   | 2 <sup>g</sup>   | –                                    | 6               | 4                | 2               | 2 Azathioprine, 1 Copaxone, 1 Interferon-β               | 10 NMOSD without LETM                       | (256) |
|                    | ↑     | NR <sup>gh</sup> | NR <sup>gh</sup> | NR <sup>h</sup>                      | NR <sup>h</sup> | NR <sup>h</sup>  | NR <sup>h</sup> | NR <sup>h</sup>                                          | 10 RRMS                                     | (256) |
|                    | ↔     | 31               | –                | 31                                   | –               | 25               | 6               | 19 Tx <sup>i</sup> , 15 Prednisolone, 7 Interferon-β     | 18 ONND                                     | (230) |
| CXCL10             | ↔     | 2                | 17               | –                                    | 19              | 19               | –               | 12 AZA, 13 PRN, 2 MMF, 1 CP, 1 RTX, 1 MTO                | 10 MS                                       | (258) |
|                    | ↑     | 4 <sup>g</sup>   | 2 <sup>g</sup>   | –                                    | 6               | 4                | 2               | 2 Azathioprine, 1 Copaxone, 1 Interferon-β               | 10 NMOSD without LETM                       | (256) |
|                    | ↔     | 31               | –                | 31                                   | –               | 25               | 6               | 19 Any Tx <sup>i</sup> , 15 Prednisolone, 7 Interferon-β | 18 ONND                                     | (230) |
| CXCL13             | ↔     | 13               | –                | 13                                   | –               | NR               | NR              | –                                                        | 17 MS, 15 ONND                              | (244) |
|                    | ↑     | 8                | 1                | 9                                    | –               | 6                | 3               | 3 Corticosteroids                                        | 9 ONND                                      | (234) |
|                    | ↑     | 22               | 2                | –                                    | 24              | NR               | NR              | 7 GC, 2 AZA, 7 GC + AZA                                  | 22 HC                                       | (266) |
|                    | ↔     | 8                | 1                | 9                                    | –               | 6                | 3               | 3 Corticosteroids                                        | 9 MS                                        | (234) |
| G-CSF              | ↔     | 22               | 2                | –                                    | 24              | NR               | NR              | 7 GC, 2 AZA, 7 GC + AZA                                  | 20 RRMS                                     | (266) |
|                    | ↔     | 2                | 17               | –                                    | 19              | 19               | –               | 12 AZA, 13 PRN, 2 MMF, 1 CP, 1 RTX, 1 MTO                | 10 MS                                       | (258) |
| GFAP               | ↑     | 58               | 19               | NR                                   | NR              | 36 <sup>j</sup>  | 27 <sup>j</sup> | NR                                                       | 48 RION, 39 UCON, 38 MSON, 18 CRION, 11 ION | (265) |
|                    | ↔     | 58               | 19               | NR                                   | NR              | 36 <sup>i</sup>  | 27 <sup>i</sup> | NR                                                       | 47 RRMS, 45 HC                              | (265) |
| Haptoglobin        | ↔     | 22               | 3                | 25                                   | –               | NR               | NR              | NR                                                       | 16 MS, 15 AD, 22 OND                        | (192) |

|              |   |                 |                 |    |    |    |    |                                                             |                           |       |
|--------------|---|-----------------|-----------------|----|----|----|----|-------------------------------------------------------------|---------------------------|-------|
| HMGB1        | ↔ | 39              | 3               | 42 | –  | 36 | 6  | 17 Tx <sup>i</sup> , 14 Prednisolone, 3 Interferon-β, 5 AZA | 30 RRMS, 30 ONND          | (250) |
| hs-CRP       | ↑ | 47              | 9               | 56 | –  | 44 | 12 | –                                                           | 56 HC                     | (255) |
| IL-1β        | ↑ | 23              | 2               | –  | 25 | NR | NR | NR                                                          | 20 HC                     | (259) |
|              | ↔ | 2               | 17              | –  | 19 | 19 | –  | 12 AZA, 13 PRN, 2 MMF, 1 CP, 1 RTX, 1 MTO                   | 10 MS                     | (258) |
|              | ↔ | 23              | 2               | –  | 25 | NR | NR | NR                                                          | 25 MS                     | (259) |
| IL-1Ra       | ↔ | 31              | –               | 31 | –  | 25 | 6  | 19 Tx <sup>i</sup> , 15 Prednisolone, 7 Interferon-β        | 18 ONND                   | (230) |
|              | ↔ | 2               | 17              | –  | 19 | 19 | –  | 12 AZA, 13 PRN, 2 MMF, 1 CP, 1 RTX, 1 MTO                   | 10 MS                     | (258) |
| IL-2         | ↑ | 32              | 2               | –  | 34 | 14 | 19 | 20 Interferon-β                                             | 24 RRMS, 30 HC            | (264) |
| IL-4         | ↑ | 21              | 7               | NR | NR | NR | NR | 28 Methylprednisolone                                       | 28 HC                     | (260) |
|              | ↑ | 32              | 2               | –  | 34 | 14 | 19 | 20 Interferon-β                                             | 24 RRMS, 30 HC            | (264) |
|              | ↔ | 2               | 17              | –  | 19 | 19 | –  | 12 AZA, 13 PRN, 2 MMF, 1 CP, 1 RTX, 1 MTO                   | 10 MS                     | (258) |
| IL-5         | ↔ | 4 <sup>g</sup>  | 2 <sup>g</sup>  | –  | 6  | 4  | 2  | 2 Azathioprine, 1 Copaxone, 1 Interferon-β                  | 10 NMOSD without LETM     | (256) |
| IL-6         | ↑ | 31              | –               | 31 | –  | 25 | 6  | 19 Tx <sup>i</sup> , 15 Prednisolone, 7 Interferon-β        | 18 ONND                   | (230) |
|              | ↑ | 32              | 2               | –  | 34 | 14 | 19 | 20 Interferon-β                                             | 30 HC                     | (264) |
|              | ↔ | 27              | 2               | 29 | –  | 24 | 5  | 15 Tx <sup>i</sup> , 14 Prednisolone, 1 Interferon-β, 1 AZA | 29 RRMS, 17 ONND, 10 OIND | (241) |
|              | ↔ | 10              | 4               | 14 | –  | 11 | 3  | –                                                           | 20 RRMS, 16 HC            | (257) |
|              | ↔ | 2               | 17              | –  | 19 | 19 | –  | 12 AZA, 13 PRN, 2 MMF, 1 CP, 1 RTX, 1 MTO                   | 10 MS                     | (258) |
|              | ↔ | 17              | 4               | 21 | –  | 18 | 3  | –                                                           | 15 RRMS, 12 HC            | (263) |
|              | ↔ | 32              | 2               | –  | 34 | 14 | 19 | 20 Interferon-β                                             | 24 RRMS                   | (264) |
| IL-9         | ↔ | 2               | 17              | –  | 19 | 19 | –  | 12 AZA, 13 PRN, 2 MMF, 1 CP, 1 RTX, 1 MTO                   | 10 MS                     | (258) |
| IL-10        | ↑ | 32              | 2               | –  | 34 | 14 | 19 | 20 Interferon-β                                             | 24 RRMS, 30 HC            | (264) |
|              | ↔ | 31              | –               | 31 | –  | 25 | 6  | 19 Tx <sup>i</sup> , 15 Prednisolone, 7 Interferon-β        | 18 ONND                   | (230) |
|              | ↔ | 2               | 17              | –  | 19 | 19 | –  | 12 AZA, 13 PRN, 2 MMF, 1 CP, 1 RTX, 1 MTO                   | 10 MS                     | (258) |
|              | ↓ | NR <sup>d</sup> | NR <sup>d</sup> | –  | 11 | NR | NR | –                                                           | 11 HC                     | (261) |
| IL-12        | ↔ | 4 <sup>g</sup>  | 2 <sup>g</sup>  | –  | 6  | 4  | 2  | 2 Azathioprine, 1 Copaxone, 1 Interferon-β                  | 10 NMOSD without LETM     | (256) |
| IL-12p40     | ↔ | 4 <sup>g</sup>  | 2 <sup>g</sup>  | –  | 6  | 4  | 2  | 2 Azathioprine, 1 Copaxone, 1 Interferon-β                  | 10 NMOSD without LETM     | (256) |
| IL-13        | ↔ | 31              | –               | 31 | –  | 25 | 6  | 19 Tx <sup>i</sup> , 15 Prednisolone, 7 Interferon-β        | 18 ONND                   | (230) |
|              | ↔ | 2               | 17              | –  | 19 | 19 | –  | 12 AZA, 13 PRN, 2 MMF, 1 CP, 1 RTX, 1 MTO                   | 10 MS                     | (258) |
| IL-17        | ↑ | 32              | 2               | –  | 34 | 14 | 19 | 20 Interferon-β                                             | 30 HC                     | (264) |
|              | ↔ | 32              | 2               | –  | 34 | 14 | 19 | 20 Interferon-β                                             | 24 RRMS                   | (264) |
| IL-17A       | ↑ | 4 <sup>g</sup>  | 2 <sup>g</sup>  | –  | 6  | 4  | 2  | 2 Azathioprine, 1 Copaxone, 1 Interferon-β                  | 10 NMOSD without LETM     | (256) |
|              | ↑ | 10              | 4               | 14 | –  | 11 | 3  | –                                                           | 20 RRMS, 16 HC            | (257) |
|              | ↑ | 2               | 17              | –  | 19 | 19 | –  | 12 AZA, 13 PRN, 2 MMF, 1 CP, 1 RTX, 1 MTO                   | 10 MS                     | (258) |
|              | ↑ | 10 <sup>k</sup> | 5 <sup>k</sup>  | 16 | –  | 12 | 4  | –                                                           | 16 ONND                   | (262) |
|              | ↔ | 27              | 2               | 29 | –  | 24 | 5  | 15 Tx <sup>i</sup> , 14 Prednisolone, 1 Interferon-β, 1 AZA | 29 RRMS, 17 ONND, 10 OIND | (241) |
|              | ↔ | 10 <sup>k</sup> | 5 <sup>k</sup>  | 16 | –  | 12 | 4  | –                                                           | 14 RRMS                   | (262) |
| IL-17F       | ↑ | 4 <sup>g</sup>  | 2 <sup>g</sup>  | –  | 6  | 4  | 2  | 2 Azathioprine, 1 Copaxone, 1 Interferon-β                  | 10 NMOSD without LETM     | (256) |
|              | ↔ | 2               | 17              | –  | 19 | 19 | –  | 12 AZA, 13 PRN, 2 MMF, 1 CP, 1 RTX, 1 MTO                   | 10 MS                     | (258) |
| IL-21        | ↑ | 10              | 4               | 14 | –  | 11 | 3  | –                                                           | 16 HC                     | (257) |
|              | ↑ | 17              | 4               | 21 | –  | 18 | 3  | –                                                           | 12 HC                     | (263) |
|              | ↔ | 10              | 4               | 14 | –  | 11 | 3  | –                                                           | 20 RRMS                   | (257) |
|              | ↔ | 17              | 4               | 21 | –  | 18 | 3  | –                                                           | 15 RRMS                   | (263) |
| IL-22        | ↑ | 17              | 4               | 21 | –  | 18 | 3  | –                                                           | 12 HC                     | (263) |
|              | ↔ | 17              | 4               | 21 | –  | 18 | 3  | –                                                           | 15 RRMS                   | (263) |
| IL-23        | ↑ | 10              | 4               | 14 | –  | 11 | 3  | –                                                           | 16 HC                     | (257) |
|              | ↑ | 10 <sup>k</sup> | 5 <sup>k</sup>  | 16 | –  | 12 | 4  | –                                                           | 16 ONND                   | (262) |
|              | ↔ | 10              | 4               | 14 | –  | 11 | 3  | –                                                           | 20 RRMS                   | (257) |
|              | ↔ | 10 <sup>k</sup> | 5 <sup>k</sup>  | 16 | –  | 12 | 4  | –                                                           | 14 RRMS                   | (262) |
| IL-27        | ↔ | 17              | 4               | 21 | –  | 18 | 3  | –                                                           | 15 RRMS, 12 HC            | (263) |
|              | ↓ | 37              | 8               | NR | NR | 36 | 9  | Prednisolone <sup>f</sup> , Azathioprine <sup>f</sup>       | 19 ONND, 40 HC            | (253) |
| IL-35        | ↓ | 37              | 8               | NR | NR | 36 | 9  | Prednisolone <sup>f</sup> , Azathioprine <sup>f</sup>       | 19 ONND, 40 HC            | (253) |
| Interferon-β | ↑ | 4 <sup>g</sup>  | 2 <sup>g</sup>  | –  | 6  | 4  | 2  | 2 Azathioprine, 1 Copaxone, 1 Interferon-β                  | 10 NMOSD without LETM     | (256) |
| Interferon-γ | ↑ | 32              | 2               | –  | 34 | 14 | 19 | 20 Interferon-β                                             | 24 RRMS, 30 HC            | (264) |
|              | ↔ | 21              | 7               | NR | NR | NR | NR | 28 Methylprednisolone                                       | 28 HC                     | (260) |
|              | ↔ | NR <sup>d</sup> | NR <sup>d</sup> | –  | 11 | NR | NR | –                                                           | 11 HC                     | (261) |

|                          |   |                 |                 |    |    |                 |                 |                                                             |                                                             |       |
|--------------------------|---|-----------------|-----------------|----|----|-----------------|-----------------|-------------------------------------------------------------|-------------------------------------------------------------|-------|
|                          | ↔ | 17              | 4               | 21 | –  | 18              | 3               | –                                                           | 12 HC                                                       | (263) |
|                          | ↓ | 17              | 4               | 21 | –  | 18              | 3               | –                                                           | 15 RRMS                                                     | (263) |
| MDA                      | ↑ | NR <sup>d</sup> | NR <sup>d</sup> | –  | 11 | NR              | NR              | –                                                           | 11 HC                                                       | (261) |
| MMP-2                    | ↔ | 27              | 2               | 29 | –  | 24              | 5               | 15 Tx <sup>i</sup> , 14 Prednisolone, 1 Interferon-β, 1 AZA | 29 RRMS, 17 ONND, 10 OIND                                   | (241) |
| MMP-9                    | ↑ | 13              | –               | 13 | –  | 13              | –               | 8 Immune Suppressed <sup>l</sup>                            | 15 MS                                                       | (242) |
|                          | ↔ | 27              | 2               | 29 | –  | 24              | 5               | 15 Tx <sup>i</sup> , 14 Prednisolone, 1 Interferon-β, 1 AZA | 29 RRMS, 17 ONND, 10 OIND                                   | (241) |
|                          | ↔ | NR <sup>d</sup> | NR <sup>d</sup> | –  | 11 | NR              | NR              | –                                                           | 11 HC                                                       | (261) |
| MMP-13                   | ↔ | 27              | 2               | 29 | –  | 24              | 5               | 15 Tx <sup>i</sup> , 14 Prednisolone, 1 Interferon-β, 1 AZA | 29 RRMS, 17 ONND, 10 OIND                                   | (241) |
| MPO                      | ↔ | 2               | 17              | –  | 19 | 19              | –               | 12 AZA, 13 PRN, 2 MMF, 1 CP, 1 RTX, 1 MTO                   | 10 MS                                                       | (258) |
| PTX-2                    | ↔ | 2               | 17              | –  | 19 | 19              | –               | 12 AZA, 13 PRN, 2 MMF, 1 CP, 1 RTX, 1 MTO                   | 10 MS                                                       | (258) |
| Resistin                 | ↑ | 47              | 9               | 56 | –  | 44              | 12              | –                                                           | 56 HC                                                       | (255) |
| S100B                    | ↔ | 58              | 19              | NR | NR | 36 <sup>j</sup> | 27 <sup>j</sup> | NR                                                          | 48 RION, 39 UCON, 38 MSON, 18 CRION, 11 ION, 47 RRMS, 45 HC | (265) |
| sICAM-1                  | ↑ | 25              | –               | 25 | –  | 19              | 6               | 12 Prednisolone                                             | 17 HC                                                       | (238) |
|                          | ↔ | 25              | –               | 25 | –  | 19              | 6               | 12 Prednisolone                                             | 21 RRMS, 20 ONND                                            | (238) |
| SOD                      | ↑ | NR <sup>d</sup> | NR <sup>d</sup> | –  | 11 | NR              | NR              | –                                                           | 11 HC                                                       | (261) |
| Soluble CD40 Ligand      | ↑ | 25              | 2               | 27 | –  | 25              | 2               | 3 Corticosteroids + Azathioprine                            | 14 HC                                                       | (267) |
|                          | ↔ | 27              | 2               | 29 | –  | 24              | 5               | 15 Tx <sup>g</sup> , 14 Prednisolone, 1 Interferon-β, 1 AZA | 29 MS, 17 ONND, 10 OIND                                     | (72)  |
|                          | ↔ | 25              | 2               | 27 | –  | 25              | 2               | 3 Corticosteroids + Azathioprine                            | 19 RRMS                                                     | (267) |
| sVCAM-1                  | ↔ | 25              | –               | 25 | –  | 19              | 6               | 12 Prednisolone                                             | 21 RRMS, 20 ONND, 17 HC                                     | (238) |
| TIMP-1                   | ↔ | 27              | 2               | 29 | –  | 24              | 5               | 15 Tx <sup>i</sup> , 14 Prednisolone, 1 Interferon-β, 1 AZA | 29 RRMS, 17 ONND, 10 OIND                                   | (241) |
|                          | ↔ | NR <sup>d</sup> | NR <sup>d</sup> | –  | 11 | NR              | NR              | –                                                           | 11 HC                                                       | (261) |
| TGF-β                    | ↔ | 10              | 4               | 14 | –  | 11              | 3               | –                                                           | 20 RRMS, 16 HC                                              | (257) |
| THP                      | ↑ | NR <sup>d</sup> | NR <sup>d</sup> | –  | 11 | NR              | NR              | –                                                           | 11 HC                                                       | (261) |
| Tissue necrosis factor-α | ↑ | 23              | 2               | –  | 25 | NR              | NR              | NR                                                          | 20 HC                                                       | (259) |
|                          | ↑ | 32              | 2               | –  | 34 | 14              | 19              | 20 Interferon-β                                             | 30 HC                                                       | (264) |
|                          | ↔ | 2               | 17              | –  | 19 | 19              | –               | 12 AZA, 13 PRN, 2 MMF, 1 CP, 1 RTX, 1 MTO                   | 10 MS                                                       | (258) |
|                          | ↔ | 23              | 2               | –  | 25 | NR              | NR              | NR                                                          | 25 MS                                                       | (259) |
|                          | ↔ | 32              | 2               | –  | 34 | 14              | 19              | 20 Interferon-β                                             | 24 RRMS                                                     | (264) |
|                          | ↓ | NR <sup>d</sup> | NR <sup>d</sup> | –  | 11 | NR              | NR              | –                                                           | 11 HC                                                       | (261) |

AMCase, acidic mammalian chitinase; AD, Alzheimer's disease; AOPP, advanced oxidation protein products; AQP4-Ab, aquaporin-4 autoantibody; AZA, azathioprine; BAFF, B-cell activating factor; C5b-9, terminal complement complex; CCL, chemokine (C-C motif) ligand; CHI3L1, chitinase-3-like proteins 1; ChT, chitotriosidase; CNS, central nervous system; CP, cyclophosphamide; CRION, chronic relapsing isolated optic neuritis; CRP, c-reactive protein; CXCL, chemokine (C-X-C motif) ligand; GC, glucocorticoids; G-CSF, granulocyte colony stimulating factor; GFAP, glial fibrillary acidic protein; HC, healthy control; HGMB1, high mobility box protein 1; hs-CRP, high sensitivity c-reactive protein; IL, interleukin; IL-1Ra, interleukin-1 receptor antagonist; ION, isolated optic neuritis; LAP, relapse; LETM, longitudinally extensive transverse myelitis; MDA, malonyldialdehyde; MMF, mycophenolate mofetil; MMP, matrix metalloproteinase; MPO, myeloperoxidase; MS, multiple sclerosis; MSON, multiple sclerosis optic neuritis; MTO, mitoxantrone; NMOSD, neuromyelitis optica spectrum disorder; NR, Not reported; OIND, other inflammatory neurologic disorders; ON, optic neuritis; OND, other neurologic disorders; ONND, other non-inflammatory neurologic disorders; PDN, prednisolone; PTX, pentraxin; RION, relapsing inflammatory optic neuropathy; REM, remission; RRMS, relapsing remitting multiple sclerosis; RTX, rituximab; S100B, S100 calcium-binding protein B; sICAM-1, soluble intercellular adhesion molecule 1; SOD, superoxide dismutase; SPMS, secondary progressive MS; sVCAM-1, soluble vascular cell adhesion molecule 1; TARC, thymus and activation regulated chemokine; TGF-β, transforming growth factor beta; THP, total hydroperoxides; TIMP, tissue inhibitor of metalloproteinases; TNF-α, tissue necrosis factor alpha; Tx, treatment; UCON, unclassified optic neuritis.

✓ Endpoint variation only applies to the disease state marked with the check mark, though the sample size was not explicitly reported.

<sup>a</sup> Differentiates between NMOSD patient disease status at time of biopsy sampling, not between monophasic vs. relapsing-remitting forms of disease.

<sup>b</sup> Defines preventative treatments provided during patient's remitting period of disease, not for treatment of acute relapse. Patients not receiving treatment during remission were omitted from this column.

<sup>c</sup> If multiple groups are listed, there was statistical significance reported between the study group and both comparison groups.

<sup>d</sup> This study cohort consisted of 11 relapsing-remitting NMOSD patients, however, the sex distribution of this study subgroup was not reported.

<sup>e</sup> This study cohort consisted of 25 AQP4-IgG seropositive MS patients, 19 of which fulfilled the revised 2006 Wingerchuk NMO diagnostic criteria, though the sex distribution of this subset of patients was not reported.

<sup>f</sup> Patients were seronegative for AQP4-IgG.

<sup>g</sup> NMOSD patients in study group presented with LETM, defined as spinal cord lesions extending continuously for more than 3 vertebral segments on MRI.

<sup>h</sup> One of the original six NMOSD patients was removed from the study prior to analysis of this endpoint, thereby altering the sample's demographic data.

<sup>i</sup> This study did not specify between patients receiving monotherapy or combination therapy.

<sup>j</sup> Though 63 NMOSD patients were tested for AQP4-IgG, 14 remained untested and therefore have an unknown autoantibody serostatus.

<sup>k</sup> Though this study reported an NMOSD study group with an n of 16, the sex distribution of only 15 patients were included in the demographic data.

<sup>l</sup> Patients received at least one immunomodulatory therapy, such as corticosteroids, azathioprine, methylprednisolone pulse therapy, or IFN-β.
