# Supplementary material for: Metabolomic Profiling in Neuromyelitis Optica Spectrum Disorder Biomarker Discovery
Source: MDPI journal article supplement (doi:10.3390/metabo10090374), 2020-09-18
Supplement: s1 [file s1]

**Supplementary Table 4. Plasma Outcomes in Targeted Immunoassay-based NMOSD Studies.**

| Endpoint                 | Shift | NMOSD Cohort |   | Disease State at Biopsy <sup>a</sup> |     | AQP4-Ab Serology |                 | Treatment <sup>b</sup>                                                     | Control <sup>c</sup> | Ref.  |
|--------------------------|-------|--------------|---|--------------------------------------|-----|------------------|-----------------|----------------------------------------------------------------------------|----------------------|-------|
|                          |       | F            | M | LAP                                  | REM | +                | -               |                                                                            |                      |       |
| Bb                       | ↑     | 46           | 8 | 9                                    | 45  | 39               | 15 <sup>d</sup> | 20 DMT, 8 Prednisolone, 16 DMT + Prednisolone                              | 40 RRMS, 69 HC       | (216) |
| Complement C1inh         | ↑     | 46           | 8 | 9                                    | 45  | 39               | 15 <sup>d</sup> | 20 DMT, 8 Prednisolone, 16 DMT + Prednisolone                              | 40 RRMS, 69 HC       | (216) |
| Complement C1s           | ↑     | 46           | 8 | 9                                    | 45  | 39               | 15 <sup>d</sup> | 20 DMT, 8 Prednisolone, 16 DMT + Prednisolone                              | 40 RRMS, 69 HC       | (216) |
| Complement C3            | ↓     | 37           | 2 | 9                                    | 45  | 39 <sup>e</sup>  | —               | 17 DMT, 4 Prednisolone, 10 DMT + Prednisolone                              | 40 RRMS, 69 HC       | (216) |
| Complement C3a           | ↑     | 15           | 4 | 10                                   | 9   | 19               | —               | 10 Monotherapy <sup>f</sup> , 6 Combination Tx <sup>g</sup> , 1 Stem Cells | 40 HC                | (221) |
|                          | ↔     | 15           | 4 | 10                                   | 9   | 19               | —               | 10 Monotherapy <sup>f</sup> , 6 Combination Tx <sup>g</sup> , 1 Stem Cells | 35 MS                | (221) |
| Complement iC3b          | ↑     | 46           | 8 | 9                                    | 45  | 39               | 15 <sup>d</sup> | 20 DMT, 8 Prednisolone, 16 DMT + Prednisolone                              | 40 RRMS, 69 HC       | (216) |
| Complement C4a           | ↑     | 15           | 4 | 10                                   | 9   | 19               | —               | 10 Monotherapy <sup>f</sup> , 6 Combination Tx <sup>g</sup> , 1 Stem Cells | 35 MS, 40 HC         | (221) |
| Complement C4d           | ↑     | 46           | 8 | 9                                    | 45  | 39               | 15 <sup>d</sup> | 20 DMT, 8 Prednisolone, 16 DMT + Prednisolone                              | 40 RRMS, 69 HC       | (216) |
| Complement C5            | ↑     | 46           | 8 | 9                                    | 45  | 39               | 15 <sup>d</sup> | 20 DMT, 8 Prednisolone, 16 DMT + Prednisolone                              | 40 RRMS, 69 HC       | (216) |
| Complement C5a           | ↑     | 46           | 8 | 9                                    | 45  | 39               | 15 <sup>d</sup> | 20 DMT, 8 Prednisolone, 16 DMT + Prednisolone                              | 40 RRMS, 69 HC       | (216) |
| Factor H                 | ↑     | 46           | 8 | 9                                    | 45  | 39               | 15 <sup>d</sup> | 20 DMT, 8 Prednisolone, 16 DMT + Prednisolone                              | 40 RRMS, 69 HC       | (216) |
| HMGB1                    | ↑     | 28           | 1 | 29                                   | —   | 10               | 19              | 29 Azathioprine                                                            | 20 RRMS              | (271) |
| IL-1β                    | ↑     | 16           | 4 | —                                    | 20  | 15               | 5               | —                                                                          | 20 HC                | (269) |
| IL-6                     | ↑     | 17           | 9 | 26                                   | —   | 20               | 6               | 22 Low Dose Steroids, 18 Azathioprine                                      | 22 HC                | (270) |
|                          | ↑     | 16           | 4 | —                                    | 20  | 15               | 5               | —                                                                          | 20 HC                | (269) |
|                          | ↔     | 17           | 9 | 26                                   | —   | 20               | 6               | 22 Low Dose Steroids, 18 Azathioprine                                      | 23 RRMS              | (270) |
| IL-10                    | ↔     | 16           | 4 | —                                    | 20  | 15               | 5               | —                                                                          | 20 HC                | (269) |
| IL-12                    | ↔     | 16           | 4 | —                                    | 20  | 15               | 5               | —                                                                          | 20 HC                | (270) |
| IL-17                    | ↑     | 28           | 1 | 29                                   | —   | 10               | 19              | 29 Azathioprine                                                            | 20 RRMS              | (271) |
|                          | ↑     | 17           | 9 | 26                                   | —   | 20               | 6               | 22 Low Dose Steroids, 18 Azathioprine                                      | 22 HC                | (270) |
|                          | ↔     | 16           | 4 | —                                    | 20  | 15               | 5               | —                                                                          | 20 HC                | (269) |
|                          | ↔     | 17           | 9 | 26                                   | —   | 20               | 6               | 22 Low Dose Steroids, 18 Azathioprine                                      | 23 RRMS              | (270) |
| IL-21                    | ↔     | 16           | 4 | —                                    | 20  | 15               | 5               | —                                                                          | 20 HC                | (269) |
| IL-23                    | ↔     | 16           | 4 | —                                    | 20  | 15               | 5               | —                                                                          | 20 HC                | (269) |
| IL-32α                   | ↑     | 17           | 9 | 26                                   | —   | 20               | 6               | 22 Low Dose Steroids, 18 Azathioprine                                      | 23 RRMS, 22 HC       | (270) |
| Interferon-γ             | ↑     | 28           | 1 | 29                                   | —   | 10               | 19              | 29 Azathioprine                                                            | 20 RRMS              | (271) |
| Neutrophil Elastase      | ↑     | 4            | 2 | —                                    | 6   | 5                | 1               | 3 Rituximab, 1 Plasma Exchange                                             | 7 HC                 | (256) |
| sC5b-9                   | ↑     | 46           | 8 | 9                                    | 45  | 39               | 15 <sup>d</sup> | 20 DMT, 8 Prednisolone, 16 DMT + Prednisolone                              | 40 RRMS, 69 HC       | (216) |
|                          | ↑     | 15           | 4 | 10                                   | 9   | 19               | —               | 10 Monotherapy <sup>f</sup> , 6 Combination Tx <sup>g</sup> , 1 Stem Cells | 40 HC                | (221) |
|                          | ↔     | 15           | 4 | 10                                   | 9   | 19               | —               | 10 Monotherapy <sup>f</sup> , 6 Combination Tx <sup>g</sup> , 1 Stem Cells | 35 MS                | (221) |
| Tissue necrosis factor-α | ↑     | 28           | 1 | 29                                   | —   | 10               | 19              | 29 Azathioprine                                                            | 20 RRMS              | (271) |
|                          | ↔     | 16           | 4 | —                                    | 20  | 15               | 5               | —                                                                          | 20 HC                | (269) |

AQP4-Ab, aquaporin-4 autoantibody; Bb, activated complement factor B; C1inh, C1-inhibitor; DMT, disease modifying therapies (including methotrexate, azathioprine, mycophenolate mofetil, rituximab, or intravenous immunoglobulin); HC, healthy controls; HMGB1, high mobility group box 1 protein; IL, interleukin; LAP, relapse; MS, multiple sclerosis; NMOSD, neuromyelitis optica spectrum disorder; NR, not reported; REM, remission; RRMS, relapsing-remitting multiple sclerosis; sC5b-9, soluble terminal complement complex; Tx, treatment.

<sup>a</sup> Differentiates between NMOSD patient disease status at time of biopsy sampling, not between monophasic vs. relapsing-remitting forms of disease.

<sup>b</sup> Defines preventative treatments provided during patient's remitting period of disease, not for treatment of acute relapse. Patients not receiving treatment during remission were omitted from this column.

<sup>c</sup> If multiple groups are listed, there was statistical significance reported between the study group and both comparison groups.

<sup>d</sup> Seven of 15 AQP4-IgG negative NMOSD patients were MOG-IgG seropositive.

<sup>e</sup> C3 levels were significantly lower only in the AQP4-IgG positive NMOSD group compared to RRMS & HC groups.

<sup>f</sup> Monotherapies include low dose prednisone, mycophenolate mofetil, cyclophosphamide, and rituximab.

<sup>g</sup> Combination therapies could be widely variable, but must include two or more treatments, e.g. prednisone with azathioprine.
