# Supplementary material for: Metabolomic Profiling in Neuromyelitis Optica Spectrum Disorder Biomarker Discovery
Source: MDPI journal article supplement (doi:10.3390/metabo10090374), 2020-09-18
Supplement: s1 [file s1]

**Supplementary Table 5. Peripheral Blood Outcomes in Targeted Immunoassay-based NMOSD Studies.**

| Endpoint                          | Shift | NMOSD Cohort |    | Disease State at Biopsy <sup>a</sup> |     | AQP4-Ab Serology |    | Treatment <sup>b</sup> | Control <sup>c</sup>             | Ref.  |
|-----------------------------------|-------|--------------|----|--------------------------------------|-----|------------------|----|------------------------|----------------------------------|-------|
|                                   |       | F            | M  | LAP                                  | REM | +                | -  |                        |                                  |       |
| B-cell activating factor receptor | ↑     | 39           | 12 | 51                                   | –   | 29               | 22 | 7 Prednisone           | 37 HC                            | (252) |
|                                   | ↔     | 39           | 12 | 51                                   | –   | 29               | 22 | 7 Prednisone           | 42 RRMS                          | (252) |
| Chemokine (C-C motif) ligand 24   | ↔     | 8            | 4  | 9                                    | 3   | NR               | NR | –                      | 24 RRMS, 24 SPMS, 24 OIND, 24 HC | (214) |
|                                   | ↔     | 6            | 2  | 8                                    | –   | NR               | NR | –                      | 16 RRMS, 16 SPMS, 16 HC          | (66)  |
| Chemokine (C-C motif) ligand 26   | ↔     | 8            | 4  | 9                                    | 3   | NR               | NR | –                      | 24 RRMS, 24 SPMS, 24 OIND, 24 HC | (214) |
|                                   | ↔     | 6            | 2  | 8                                    | –   | NR               | NR | –                      | 16 RRMS, 16 SPMS, 16 HC          | (66)  |
| C-X-C motif chemokine receptor 5  | ↑     | 39           | 12 | 51                                   | –   | 29               | 22 | 7 Prednisone           | 37 HC                            | (252) |
|                                   | ↔     | 39           | 12 | 51                                   | –   | 29               | 22 | 7 Prednisone           | 42 RRMS                          | (252) |
| Eosinophil cationic protein       | ↔     | 6            | 2  | 8                                    | –   | NR               | NR | –                      | 16 RRMS, 16 SPMS, 16 HC          | (66)  |
| IL-5                              | ↔     | 8            | 4  | 9                                    | 3   | NR               | NR | –                      | 24 RRMS, 24 SPMS, 24 OIND, 24 HC | (214) |
|                                   | ↔     | 6            | 2  | 8                                    | –   | NR               | NR | –                      | 16 RRMS, 16 SPMS, 16 HC          | (66)  |
| IL-6                              | ↑     | 6            | 2  | 8                                    | –   | NR               | NR | –                      | 16 RRMS, 16 SPMS, 16 HC          | (66)  |
|                                   | ↔     | 8            | 4  | 9                                    | 3   | NR               | NR | –                      | 24 RRMS, 24 SPMS, 24 OIND, 24 HC | (214) |
| IL-10                             | ↓     | 39           | 12 | 51                                   | –   | 29               | 22 | 7 Prednisone           | 42 RRMS, 37 HC                   | (252) |
| IL-12                             | ↑     | 6            | 2  | 8                                    | –   | NR               | NR | –                      | 16 HC                            | (66)  |
|                                   | ↔     | 6            | 2  | 8                                    | –   | NR               | NR | –                      | 16 RRMS, 16 SPMS                 | (66)  |
| IL-13                             | ↔     | 8            | 4  | 9                                    | 3   | NR               | NR | –                      | 24 RRMS, 24 SPMS, 24 OIND, 24 HC | (214) |
| Interferon-γ                      | ↑     | 39           | 12 | 51                                   | –   | 29               | 22 | 7 Prednisone           | 37 HC                            | (252) |
|                                   | ↔     | 39           | 12 | 51                                   | –   | 29               | 22 | 7 Prednisone           | 42 RRMS                          | (252) |
| Very late antigen 4               | ↔     | 39           | 12 | 51                                   | –   | 29               | 22 | 7 Prednisone           | 42 RRMS, 37 HC                   | (252) |

AQP4-Ab, aquaporin-4 autoantibody; HC, healthy controls; IL, interleukin; LAP, relapse; MS, multiple sclerosis; NMOSD, neuromyelitis optica spectrum disorder; OIND, other inflammatory neurologic disorders; NMOSD, neuromyelitis optica spectrum disorder; NR, not reported; REM, remission; RRMS, relapsing-remitting multiple sclerosis; SPMS, secondary progressive multiple sclerosis.

<sup>a</sup> Differentiates between NMOSD patient disease status at time of biopsy sampling, not between monophasic vs. relapsing-remitting forms of disease.

<sup>b</sup> Defines preventative treatments provided during patient's remitting period of disease, not for treatment of acute relapse. Patients not receiving treatment during remission were omitted from this column.

<sup>c</sup> If multiple groups are listed, there was statistical significance reported between the study group and both comparison groups.
