# Supplementary material for: Metabolomic Profiling in Neuromyelitis Optica Spectrum Disorder Biomarker Discovery
Source: MDPI journal article supplement (doi:10.3390/metabo10090374), 2020-09-18
Supplement: s1 [file s1]

**Supplementary Table 2. CSF Outcomes in Targeted Immunoassay-based NMOSD Studies.**

| Endpoint                       | Shift | NMOSD Cohort     |                  | Disease State at Biopsy <sup>a</sup> |     | AQP4-Ab Serology |    | Treatment <sup>b</sup>               | Control <sup>c</sup>             | Ref.  |
|--------------------------------|-------|------------------|------------------|--------------------------------------|-----|------------------|----|--------------------------------------|----------------------------------|-------|
|                                |       | Fem              | M                | LAP                                  | REM | +                | -  |                                      |                                  |       |
| AMCase                         | ↑     | 8                | 4                | 9                                    | 3   | NR               | NR | –                                    | 24 RRMS, 24 SPMS, 24 OIND, 24 HC | (214) |
| Amyloid β-40                   | ↔     | 8                | 2                | NR                                   | NR  | NR               | NR | 9 Received Therapy <sup>d</sup>      | 10 MS, 6 LETM <sup>e</sup>       | (184) |
| Amyloid β-42                   | ↔     | 8                | 2                | NR                                   | NR  | NR               | NR | 9 Received Therapy <sup>d</sup>      | 10 MS, 6 LETM <sup>e</sup>       | (184) |
| APRIL                          | ↑     | 16               | 6                | 22                                   | –   | NR               | NR | –                                    | 18 RRMS, 14 ONND                 | (229) |
| BAFF                           | ↑     | 16               | 6                | 22                                   | –   | NR               | NR | –                                    | 18 RRMS, 14 ONND                 | (229) |
|                                | ↑     | 7                | 3                | 10                                   | –   | NR               | NR | –                                    | 10 RRMS, 10 ONND                 | (236) |
|                                | ↑     | 29               | 8                | 37                                   | –   | NR               | NR | PDN <sup>f</sup>                     | 21 RRMS, 30 ONND                 | (252) |
| Basic fibroblast growth factor | ↔     | 8                | 2                | NR                                   | NR  | NR               | NR | 9 Received Therapy <sup>d</sup>      | 10 MS, 6 LETM <sup>e</sup>       | (184) |
|                                | ↔     | 31               | –                | 31                                   | –   | 25               | 6  | 19 Tx <sup>g</sup> , 15 PDN, 7 IFN-β | 18 ONND                          | (230) |
|                                | ↔     | 17               | 3                | 16                                   | 4   | 19               | 1  | 2 SP, 5 PDN, 1 IFN-β, 1 IVIG         | 26 RRMS, 9 PPMS, 18 OND          | (232) |
|                                | ↓     | 31               | –                | 31                                   | –   | 25               | 6  | 19 Tx <sup>g</sup> , 15 PDN, 7 IFN-β | 29 RRMS                          | (230) |
| C3a                            | ↔     | 15               | –                | 15                                   | –   | 15               | –  | NR                                   | 15 MS, 12 OND                    | (223) |
|                                | ↔     | 19               | 7                | 26                                   | –   | 21               | 5  | –                                    | 25 RRMS, 19 OND                  | (225) |
| C4a                            | ↔     | 15               | –                | 15                                   | –   | 15               | –  | NR                                   | 15 MS, 12 OND                    | (223) |
| C5a                            | ↑     | 15               | –                | 15                                   | –   | 15               | –  | NR                                   | 12 OND                           | (223) |
|                                | ↑     | 19               | 7                | 26                                   | –   | 21               | 5  | –                                    | 19 OND                           | (225) |
|                                | ↔     | 15               | –                | 15                                   | –   | 15               | –  | NR                                   | 15 MS                            | (223) |
|                                | ↔     | 19               | 7                | 26                                   | –   | 21               | 5  | –                                    | 25 RRMS                          | (225) |
| C5b-9                          | ↑     | 19               | 7                | 26                                   | –   | 21               | 5  | –                                    | 25 RRMS, 19 OND                  | (225) |
| CCL2                           | ↔     | 8                | 2                | NR                                   | NR  | NR               | NR | 9 Received Therapy <sup>d</sup>      | 10 MS, 6 LETM <sup>e</sup>       | (184) |
|                                | ↔     | 31               | –                | 31                                   | –   | 25               | 6  | 19 Tx <sup>g</sup> , 15 PDN, 7 IFN-β | 29 RRMS, 18 ONND                 | (230) |
|                                | ↔     | 17               | 3                | 16                                   | 4   | 19               | 1  | 2 SP, 5 PDN, 1 IFN-β, 1 IVIG         | 26 RRMS, 9 PPMS, 18 OND          | (232) |
|                                | ↔     | 19 <sup>h</sup>  | 1 <sup>h</sup>   | 20                                   | –   | NR               | NR | 10 IFN-β or Corticosteroids          | 20 RRMS                          | (235) |
|                                | ↔     | NR <sup>hk</sup> | NR <sup>hk</sup> | 10                                   | –   | NR               | NR | –                                    | 15 RRMS, <sup>1</sup> 19 SCD     | (235) |
|                                | ↔     | 13               | –                | 13                                   | –   | 13               | –  | 8 Immune Suppressed <sup>i</sup>     | 15 MS                            | (242) |
|                                | ↔     | 13               | –                | 13                                   | –   | NR               | NR | –                                    | 17 MS, 15 ONND                   | (244) |
|                                | ↔     | 8                | 1                | –                                    | 9   | 8                | 1  | NR                                   | 8 L-NMOSD <sup>j</sup> , 13 RRMS | (245) |
|                                | ↓     | 19 <sup>h</sup>  | 1 <sup>h</sup>   | 20                                   | –   | NR               | NR | 10 IFN-β or Corticosteroids          | 19 SCD                           | (235) |
| CCL3                           | ↔     | 8                | 2                | NR                                   | NR  | NR               | NR | 9 Received Therapy <sup>d</sup>      | 10 MS, 6 LETM <sup>e</sup>       | (184) |
|                                | ↔     | 31               | –                | 31                                   | –   | 25               | 6  | 19 Tx <sup>g</sup> , 15 PDN, 7 IFN-β | 29 RRMS, 18 ONND                 | (230) |
|                                | ↔     | 17               | 3                | 16                                   | 4   | 19               | 1  | 2 SP, 5 PDN, 1 IFN-β, 1 IVIG         | 26 RRMS, 9 PPMS, 18 OND          | (232) |
| CCL4                           | ↑     | 17               | 3                | 16                                   | 4   | 19               | 1  | 2 SP, 5 PDN, 1 IFN-β, 1 IVIG         | 18 OND                           | (232) |
|                                | ↑     | 19 <sup>h</sup>  | 1 <sup>h</sup>   | 20                                   | –   | NR               | NR | 10 IFN-β or Corticosteroids          | 19 SCD                           | (235) |
|                                | ↑     | NR <sup>hk</sup> | NR <sup>hk</sup> | 10                                   | –   | NR               | NR | –                                    | 19 SCD                           | (235) |
|                                | ↔     | 8                | 2                | NR                                   | NR  | NR               | NR | 9 Received Therapy <sup>d</sup>      | 10 MS, 6 LETM <sup>e</sup>       | (184) |
|                                | ↔     | 31               | –                | 31                                   | –   | 25               | 6  | 19 Tx <sup>g</sup> , 15 PDN, 7 IFN-β | 18 ONND                          | (230) |
|                                | ↔     | 17               | 3                | 16                                   | 4   | 19               | 1  | 2 SP, 5 PDN, 1 IFN-β, 1 IVIG         | 26 RRMS, 9 PPMS                  | (232) |
|                                | ↔     | 19 <sup>h</sup>  | 1 <sup>h</sup>   | 20                                   | –   | NR               | NR | 10 IFN-β or Corticosteroids          | 20 RRMS                          | (235) |
|                                | ↔     | NR <sup>hk</sup> | NR <sup>hk</sup> | 10                                   | –   | NR               | NR | –                                    | 15 RRMS <sup>1</sup>             | (235) |
| CCL5                           | ↓     | 31               | –                | 31                                   | –   | 25               | 6  | 19 Tx <sup>g</sup> , 15 PDN, 7 IFN-β | 29 RRMS                          | (230) |
|                                | ↔     | 8                | 2                | NR                                   | NR  | NR               | NR | 9 Received Therapy <sup>d</sup>      | 10 MS, 6 LETM <sup>e</sup>       | (184) |
|                                | ↔     | 31               | –                | 31                                   | –   | 25               | 6  | 19 Tx <sup>g</sup> , 15 PDN, 7 IFN-β | 29 RRMS, 18 ONND                 | (230) |
|                                | ↔     | 17               | 3                | 16                                   | 4   | 19               | 1  | 2 SP, 5 PDN, 1 IFN-β, 1 IVIG         | 26 RRMS, 9 PPMS, 18 OND          | (232) |
| CCL11                          | ↔     | 8                | 1                | –                                    | 9   | 8                | 1  | NR                                   | 8 L-NMOSD <sup>j</sup> , 13 RRMS | (245) |
|                                | ↔     | 8                | 2                | NR                                   | NR  | NR               | NR | 9 Received Therapy <sup>d</sup>      | 10 MS, 6 LETM <sup>e</sup>       | (184) |
|                                | ↔     | 31               | –                | 31                                   | –   | 25               | 6  | 19 Tx <sup>g</sup> , 15 PDN, 7 IFN-β | 29 RRMS, 18 ONND                 | (230) |
|                                | ↔     | 17               | 3                | 16                                   | 4   | 19               | 1  | 2 SP, 5 PDN, 1 IFN-β, 1 IVIG         | 26 RRMS, 9 PPMS, 18 OND          | (232) |
| CCL17                          | ↑     | 13               | –                | 13                                   | –   | NR               | NR | –                                    | 17 MS, 15 ONND                   | (244) |
|                                | ↔     | 13               | –                | 13                                   | –   | NR               | NR | –                                    | 17 MS                            | (244) |
| CCL24                          | ↑     | 8                | 4                | 9                                    | 3   | NR               | NR | –                                    | 24 RRMS, 24 SPMS, 24 OIND, 24 HC | (214) |
|                                | ↑     | 6                | 2                | 8                                    | –   | NR               | NR | –                                    | 16 RRMS, 16 SPMS, 16 HC          | (66)  |
| CCL26                          | ↑     | 8                | 4                | 9                                    | 3   | NR               | NR | –                                    | 24 RRMS, 24 SPMS, 24 OIND, 24 HC | (214) |

|                                                  |   |                  |                  |    |    |    |    |                                             |                                                 |       |
|--------------------------------------------------|---|------------------|------------------|----|----|----|----|---------------------------------------------|-------------------------------------------------|-------|
|                                                  | ↑ | 6                | 2                | 8  | –  | NR | NR | –                                           | 16 RRMS, 16 SPMS, 16 HC                         | (66)  |
| CD59                                             | ↑ | 28               | 2                | 30 | –  | 26 | 4  | NR                                          | 24 ONND                                         | (254) |
|                                                  | ↔ | 28               | 2                | 30 | –  | 26 | 4  | NR                                          | 22 RRMS                                         | (254) |
| CHI3L1                                           | ↑ | 8                | 4                | 9  | 3  | NR | NR | –                                           | 24 RRMS, 24 SPMS, 24 OIND, 24 HC                | (214) |
| ChT                                              | ↑ | 8                | 4                | 9  | 3  | NR | NR | –                                           | 24 RRMS, 24 SPMS, 24 OIND, 24 HC                | (214) |
| CXCL8                                            | ↑ | 31               | –                | 31 | –  | 25 | 6  | 19 Tx <sup>g</sup> , 15 PDN, 7 IFN-β        | 29 RRMS, 18 ONND                                | (230) |
|                                                  | ↑ | 17               | 3                | 16 | 4  | 19 | 1  | 2 SP, 5 PDN, 1 IFN-β, 1 IVIG                | 26 RRMS, 9 PPMS, 18 OND                         | (232) |
|                                                  | ↑ | 19 <sup>h</sup>  | 1 <sup>h</sup>   | 20 | –  | NR | NR | 10 IFN-β or Corticosteroids                 | 20 RRMS, 19 SCD                                 | (235) |
|                                                  | ↑ | NR <sup>hk</sup> | NR <sup>hk</sup> | 10 | –  | NR | NR | –                                           | 19 SCD                                          | (235) |
|                                                  | ↑ | 13               | –                | 13 | –  | 13 | –  | 8 Immune Suppressed <sup>i</sup>            | 15 MS                                           | (242) |
|                                                  | ↔ | 8                | 2                | NR | NR | NR | NR | 9 Received Therapy <sup>d</sup>             | 10 MS, 6 LETM <sup>e</sup>                      | (184) |
|                                                  | ↔ | NR <sup>hk</sup> | NR <sup>hk</sup> | 10 | –  | NR | NR | –                                           | 15 RRMS <sup>i</sup>                            | (235) |
|                                                  | ↔ | 8                | 1                | –  | 9  | 8  | 1  | NR                                          | 8 L-NMOSD <sup>j</sup> , 13 RRMS                | (245) |
| CXCL9                                            | ↔ | 8                | 1                | –  | 9  | 8  | 1  | NR                                          | 8 L-NMOSD <sup>j</sup> , 13 RRMS                | (245) |
| CXCL10                                           | ↑ | 31               | –                | 31 | –  | 25 | 6  | 19 Tx <sup>g</sup> , 15 PDN, 7 IFN-β        | 29 RRMS, 18 ONND                                | (230) |
|                                                  | ↑ | 17               | 3                | 16 | 4  | 19 | 1  | 2 SP, 5 PDN, 1 IFN-β, 1 IVIG                | 26 RRMS, 18 OND                                 | (232) |
|                                                  | ↑ | 13               | –                | 13 | –  | NR | NR | –                                           | 15 ONND                                         | (244) |
|                                                  | ↔ | 8                | 2                | NR | NR | NR | NR | 9 Received Therapy <sup>d</sup>             | 10 MS, 6 LETM <sup>e</sup>                      | (184) |
|                                                  | ↔ | 17               | 3                | 16 | 4  | 19 | 1  | 2 SP, 5 PDN, 1 IFN-β, 1 IVIG                | 9 PPMS                                          | (232) |
|                                                  | ↔ | 13               | –                | 13 | –  | 13 | –  | 8 Immune Suppressed <sup>i</sup>            | 15 MS                                           | (242) |
|                                                  | ↔ | 13               | –                | 13 | –  | NR | NR | –                                           | 17 MS                                           | (244) |
|                                                  | ↔ | 8                | 1                | –  | 9  | 8  | 1  | NR                                          | 8 L-NMOSD <sup>j</sup> , 13 RRMS                | (245) |
| CXCL12                                           | ↑ | 14               | 4                | 18 | –  | NR | NR | –                                           | 15 ONND, 17 i-ON                                | (247) |
|                                                  | ↓ | 18 <sup>m</sup>  | 2 <sup>m</sup>   | 20 | –  | 20 | –  | NR                                          | 20 NMOSD with Poor Recovery <sup>n</sup>        | (246) |
| CXCL13                                           | ↑ | 16               | 6                | 22 | –  | NR | NR | –                                           | 18 RRMS, 12 ONND                                | (233) |
|                                                  | ↑ | 8                | 1                | 9  | –  | 6  | 3  | 3 Corticosteroids                           | 9 ONND                                          | (234) |
|                                                  | ↑ | 29               | 8                | 37 | –  | NR | NR | PDN <sup>f</sup>                            | 21 RRMS, 30 ONND                                | (252) |
|                                                  | ↔ | 8                | 1                | 9  | –  | 6  | 3  | 3 Corticosteroids                           | 9 MS                                            | (234) |
| CXCL14                                           | ↑ | 14               | 4                | 18 | –  | NR | NR | –                                           | 15 ONND, 17 i-ON                                | (247) |
| DBP                                              | ↓ | 16               | 9                | 25 | –  | NR | NR | –                                           | 30 OND                                          | (187) |
| ECP                                              | ↑ | 6                | 2                | 8  | –  | NR | NR | –                                           | 16 RRMS, 16 SPMS, 16 HC                         | (66)  |
| GDNF                                             | ↔ | 8                | 2                | NR | NR | NR | NR | 9 Received Therapy <sup>d</sup>             | 10 MS, 6 LETM <sup>e</sup>                      | (184) |
| Glial fibrillary acidic protein                  | ↑ | 31               | –                | 31 | –  | 25 | 6  | 19 Tx <sup>g</sup> , 15 PDN, 7 IFN-β        | 29 RRMS, 18 ONND                                | (230) |
|                                                  | ↑ | 33               | –                | 33 | –  | 33 | –  | 8 methyl-PDN                                | 27 MS, 5 NB, 9 Meningitis, 12 OND               | (237) |
|                                                  | ↑ | 10               | 3                | 13 | –  | 12 | 1  | –                                           | 20 ONND, 9 i-ON, 9 i-Myelitis, 6 i-Encephalitis | (239) |
|                                                  | ↑ | 18 <sup>m</sup>  | 2 <sup>m</sup>   | 20 | –  | 20 | –  | NR                                          | 20 NMOSD with Poor Recovery <sup>n</sup>        | (246) |
|                                                  | ↑ | 10               | –                | 10 | –  | 10 | –  | NR                                          | 10 MS, 5 ONND, 3 ADEM, 3 SI                     | (249) |
|                                                  | ↑ | 39               | 3                | 42 | –  | 36 | 6  | 17 Tx <sup>g</sup> , 14 PDN, 3 IFN-β, 5 AZA | 30 RRMS, 30 ONND                                | (250) |
| Granulocyte colony stimulating factor            | ↑ | 31               | –                | 31 | –  | 25 | 6  | 19 Tx <sup>g</sup> , 15 PDN, 7 IFN-β        | 29 RRMS, 18 ONND                                | (230) |
|                                                  | ↑ | 17               | 3                | 16 | 4  | 19 | 1  | 2 SP, 5 PDN, 1 IFN-β, 1 IVIG                | 18 OND                                          | (232) |
|                                                  | ↔ | 8                | 2                | NR | NR | NR | NR | 9 Received Therapy <sup>d</sup>             | 10 MS, 6 LETM <sup>e</sup>                      | (184) |
|                                                  | ↔ | 17               | 3                | 16 | 4  | 19 | 1  | 2 SP, 5 PDN, 1 IFN-β, 1 IVIG                | 26 RRMS, 9 PPMS                                 | (232) |
|                                                  | ↔ | 19 <sup>h</sup>  | 1 <sup>h</sup>   | 20 | –  | NR | NR | 10 IFN-β or Corticosteroids                 | 20 RRMS, 19 SCD                                 | (235) |
|                                                  | ↔ | NR <sup>hk</sup> | NR <sup>hk</sup> | 10 | –  | NR | NR | –                                           | 15 RRMS <sup>i</sup> , 19 SCD                   | (235) |
| Granulocyte macrophage colony stimulating factor | ↔ | 8                | 2                | NR | NR | NR | NR | 9 Received Therapy <sup>d</sup>             | 10 MS, 6 LETM <sup>e</sup>                      | (184) |
|                                                  | ↔ | 31               | –                | 31 | –  | 25 | 6  | 19 Tx <sup>g</sup> , 15 PDN, 7 IFN-β        | 18 ONND                                         | (230) |
|                                                  | ↔ | 17               | 3                | 16 | 4  | 19 | 1  | 2 SP, 5 PDN, 1 IFN-β, 1 IVIG                | 26 RRMS, 9 PPMS, 18 OND                         | (232) |
|                                                  | ↓ | 31               | –                | 31 | –  | 25 | 6  | 19 Tx <sup>g</sup> , 15 PDN, 7 IFN-β        | 29 RRMS                                         | (230) |
| Haptoglobin                                      | ↑ | 22               | 3                | 25 | –  | NR | NR | NR                                          | 16 MS, 15 AD, 22 OND                            | (192) |
|                                                  | ↑ | 16               | 9                | 25 | –  | NR | NR | –                                           | 30 OND                                          | (187) |
| High mobility box protein 1                      | ↑ | 39               | 3                | 42 | –  | 36 | 6  | 17 Tx <sup>g</sup> , 14 PDN, 3 IFN-β, 5 AZA | 30 RRMS, 30 ONND                                | (250) |
|                                                  | ↑ | 16               | 6                | 22 | –  | 18 | 4  | –                                           | 14 ONND                                         | (251) |
|                                                  | ↔ | 16               | 6                | 22 | –  | 18 | 4  | –                                           | 18 RRMS                                         | (251) |
| IL-1β                                            | ↑ | 19 <sup>h</sup>  | 1 <sup>h</sup>   | 20 | –  | NR | NR | 10 IFN-β or Corticosteroids                 | 19 SCD                                          | (235) |
|                                                  | ↑ | 8                | 1                | –  | 9  | 8  | 1  | NR                                          | 8 L-NMOSD <sup>j</sup> , 13 RRMS                | (245) |

|        |   |                  |                  |    |    |    |    |                                             |                                                 |       |
|--------|---|------------------|------------------|----|----|----|----|---------------------------------------------|-------------------------------------------------|-------|
| IL-1Ra | ↔ | 8                | 2                | NR | NR | NR | NR | 9 Received Therapy <sup>d</sup>             | 10 MS, 6 LETM <sup>e</sup>                      | (184) |
|        | ↔ | 31               | –                | 31 | –  | 25 | 6  | 19 Tx <sup>g</sup> , 15 PDN, 7 IFN-β        | 29 RRMS, 18 ONND                                | (230) |
|        | ↔ | 17               | 3                | 16 | 4  | 19 | 1  | 2 SP, 5 PDN, 1 IFN-β, 1 IVIG                | 26 RRMS, 9 PPMS, 18 OND                         | (232) |
|        | ↔ | 19 <sup>h</sup>  | 1 <sup>h</sup>   | 20 | –  | NR | NR | 10 IFN-β or Corticosteroids                 | 20 RRMS                                         | (235) |
|        | ↔ | NR <sup>hk</sup> | NR <sup>hk</sup> | 10 | –  | NR | NR | –                                           | 15 RRMS <sup>i</sup> , 19 SCD                   | (235) |
|        | ↔ | 27               | 2                | 29 | –  | 24 | 5  | 15 Tx <sup>g</sup> , 14 PDN, 1 IFN-β, 1 AZA | 29 RRMS, 17 ONND, 10 OIND                       | (241) |
|        | ↑ | 31               | –                | 31 | –  | 25 | 6  | 19 Tx <sup>g</sup> , 15 PDN, 7 IFN-β        | 18 ONND                                         | (230) |
|        | ↔ | 8                | 2                | NR | NR | NR | NR | 9 Received Therapy <sup>d</sup>             | 10 MS, 6 LETM <sup>e</sup>                      | (184) |
| IL-2   | ↔ | 31               | –                | 31 | –  | 25 | 6  | 19 Tx <sup>g</sup> , 15 PDN, 7 IFN-β        | 29 RRMS                                         | (230) |
|        | ↔ | 17               | 3                | 16 | 4  | 19 | 1  | 2 SP, 5 PDN, 1 IFN-β, 1 IVIG                | 26 RRMS, 9 PPMS, 18 OND                         | (232) |
|        | ↔ | 8                | 2                | NR | NR | NR | NR | 9 Received Therapy <sup>d</sup>             | 10 MS, 6 LETM <sup>e</sup>                      | (184) |
|        | ↔ | 17               | –                | 17 | –  | 17 | –  | 2 IFN-β, 4 PDN, 1 PDN+C <sub>s</sub> A      | 21 RRMS, 21 OND                                 | (228) |
|        | ↔ | 31               | –                | 31 | –  | 25 | 6  | 19 Tx <sup>g</sup> , 15 PDN, 7 IFN-β        | 29 RRMS, 18 ONND                                | (230) |
|        | ↔ | 17               | 3                | 16 | 4  | 19 | 1  | 2 SP, 5 PDN, 1 IFN-β, 1 IVIG                | 26 RRMS, 9 PPMS, 18 OND                         | (232) |
|        | ↔ | 19 <sup>h</sup>  | 1 <sup>h</sup>   | 20 | –  | NR | NR | 10 IFN-β or Corticosteroids                 | 20 RRMS, 19 SCD                                 | (235) |
|        | ↔ | NR <sup>hk</sup> | NR <sup>hk</sup> | 10 | –  | NR | NR | –                                           | 15 RRMS <sup>i</sup> , 19 SCD                   | (235) |
| IL-4   | ↔ | 8                | 1                | –  | 9  | 8  | 1  | NR                                          | 8 L-NMOSD <sup>j</sup> , 13 RRMS                | (245) |
|        | ↔ | 8                | 2                | NR | NR | NR | NR | 9 Received Therapy <sup>d</sup>             | 10 MS, 6 LETM <sup>e</sup>                      | (184) |
|        | ↔ | 17               | –                | 17 | –  | 17 | –  | 2 IFN-β, 4 PDN, 1 PDN+C <sub>s</sub> A      | 21 RRMS, 21 OND                                 | (228) |
|        | ↔ | 31               | –                | 31 | –  | 25 | 6  | 19 Tx <sup>g</sup> , 15 PDN, 7 IFN-β        | 29 RRMS, 18 ONND                                | (230) |
|        | ↔ | 17               | 3                | 16 | 4  | 19 | 1  | 2 SP, 5 PDN, 1 IFN-β, 1 IVIG                | 26 RRMS, 9 PPMS, 18 OND                         | (232) |
|        | ↔ | 19 <sup>h</sup>  | 1 <sup>h</sup>   | 20 | –  | NR | NR | 10 IFN-β or Corticosteroids                 | 20 RRMS, 19 SCD                                 | (235) |
|        | ↔ | NR <sup>hk</sup> | NR <sup>hk</sup> | 10 | –  | NR | NR | –                                           | 15 RRMS <sup>i</sup> , 19 SCD                   | (235) |
|        | ↔ | 27               | 2                | 29 | –  | 24 | 5  | 15 Tx <sup>g</sup> , 14 PDN, 1 IFN-β, 1 AZA | 29 RRMS, 17 ONND, 10 OIND                       | (241) |
| IL-5   | ↔ | 8                | 1                | –  | 9  | 8  | 1  | NR                                          | 8 L-NMOSD <sup>j</sup> , 13 RRMS                | (245) |
|        | ↑ | 8                | 4                | 9  | 3  | NR | NR | –                                           | 24 RRMS, 24 SPMS, 24 OIND, 24 HC                | (214) |
|        | ↑ | 6                | 2                | 8  | –  | NR | NR | –                                           | 16 RRMS, 16 SPMS, 16 HC                         | (66)  |
|        | ↑ | 19 <sup>h</sup>  | 1 <sup>h</sup>   | 20 | –  | NR | NR | 10 IFN-β or Corticosteroids                 | 20 RRMS                                         | (235) |
|        | ↔ | 8                | 2                | NR | NR | NR | NR | 9 Received Therapy <sup>d</sup>             | 10 MS, 6 LETM <sup>e</sup>                      | (184) |
|        | ↔ | 31               | –                | 31 | –  | 25 | 6  | 19 Tx <sup>g</sup> , 15 PDN, 7 IFN-β        | 29 RRMS, 18 ONND                                | (230) |
|        | ↔ | 17               | 3                | 16 | 4  | 19 | 1  | 2 SP, 5 PDN, 1 IFN-β, 1 IVIG                | 26 RRMS, 9 PPMS, 18 OND                         | (232) |
|        | ↔ | 19 <sup>h</sup>  | 1 <sup>h</sup>   | 20 | –  | NR | NR | 10 IFN-β or Corticosteroids                 | 19 SCD                                          | (235) |
| IL-6   | ↔ | NR <sup>hk</sup> | NR <sup>hk</sup> | 10 | –  | NR | NR | –                                           | 15 RRMS <sup>i</sup> , 19 SCD                   | (235) |
|        | ↔ | 8                | 1                | –  | 9  | 8  | 1  | NR                                          | 8 L-NMOSD <sup>j</sup> , 13 RRMS                | (245) |
|        | ↑ | 17               | –                | 17 | –  | 17 | –  | 2 IFN-β, 4 PDN, 1 PDN+C <sub>s</sub> A      | 21 RRMS, 21 OND                                 | (228) |
|        | ↑ | 8                | 4                | 9  | 3  | NR | NR | –                                           | 24 RRMS, 24 SPMS, 24 OIND, 24 HC                | (214) |
|        | ↑ | 6                | 2                | 8  | –  | NR | NR | –                                           | 16 RRMS, 16 SPMS, 16 HC                         | (66)  |
|        | ↑ | 31               | –                | 31 | –  | 25 | 6  | 19 Tx <sup>g</sup> , 15 PDN, 7 IFN-β        | 29 RRMS, 18 ONND                                | (230) |
|        | ↑ | 16               | 6                | 22 | –  | 18 | 4  | –                                           | 18 MS, 14 ONND                                  | (231) |
|        | ↑ | 17               | 3                | 16 | 4  | 19 | 1  | 2 SP, 5 PDN, 1 IFN-β, 1 IVIG                | 26 RRMS, 9 PPMS, 18 OND                         | (232) |
| IL-7   | ↑ | 10               | 3                | 13 | –  | 12 | 1  | –                                           | 20 ONND, 9 i-ON, 9 i-Myelitis                   | (239) |
|        | ↑ | 50               | 9                | 59 | –  | NR | NR | –                                           | 76 MS, 70 OIND, 24 TM, 27 i-ON, 39 ONND, 45 NDD | (240) |
|        | ↑ | 27               | 2                | 29 | –  | 24 | 5  | 15 Tx <sup>g</sup> , 14 PDN, 1 IFN-β, 1 AZA | 29 RRMS, 17 ONND, 10 OIND                       | (241) |
|        | ↑ | 8                | 1                | –  | 9  | 8  | 1  | NR                                          | 8 L-NMOSD <sup>j</sup> , 13 RRMS                | (245) |
|        | ↑ | 39               | 3                | 42 | –  | 36 | 6  | 17 Tx <sup>g</sup> , 14 PDN, 3 IFN-β, 5 AZA | 30 RRMS, 30 ONND                                | (250) |
|        | ↑ | 16               | 6                | 22 | –  | 18 | 4  | –                                           | 18 RRMS, 14 ONND                                | (251) |
|        | ↑ | 28               | 2                | 30 | –  | 26 | 4  | NR                                          | 22 RRMS, 24 ONND                                | (254) |
|        | ↔ | 8                | 2                | NR | NR | NR | NR | 9 Received Therapy <sup>d</sup>             | 10 MS, 6 LETM <sup>e</sup>                      | (184) |
| IL-7   | ↔ | 19 <sup>h</sup>  | 1 <sup>h</sup>   | 20 | –  | NR | NR | 10 IFN-β or Corticosteroids                 | 20 RRMS, 19 SCD                                 | (235) |
|        | ↔ | NR <sup>hk</sup> | NR <sup>hk</sup> | 10 | –  | NR | NR | –                                           | 15 RRMS <sup>i</sup> , 19 SCD                   | (235) |
|        | ↔ | 10               | 3                | 13 | –  | 12 | 1  | –                                           | 6 i-Encephalitis                                | (239) |
|        | ↔ | 50               | 9                | 59 | –  | NR | NR | –                                           | 10 CNS VD, 15 CNS Tumors, 15 Epilepsy           | (240) |
|        | ↔ | 8                | 2                | NR | NR | NR | NR | 9 Received Therapy <sup>d</sup>             | 10 MS, 6 LETM <sup>e</sup>                      | (184) |
|        | ↔ | 31               | –                | 31 | –  | 25 | 6  | 19 Tx <sup>g</sup> , 15 PDN, 7 IFN-β        | 29 RRMS, 18 ONND                                | (230) |
|        | ↔ | 17               | 3                | 16 | 4  | 19 | 1  | 2 SP, 5 PDN, 1 IFN-β, 1 IVIG                | 26 RRMS, 9 PPMS, 18 OND                         | (232) |

|        |   |                  |                  |    |    |    |    |                                             |                                  |       |
|--------|---|------------------|------------------|----|----|----|----|---------------------------------------------|----------------------------------|-------|
|        | ↔ | 19 <sup>h</sup>  | 1 <sup>h</sup>   | 20 | –  | NR | NR | 10 IFN-β or Corticosteroids                 | 20 RRMS                          | (235) |
|        | ↔ | NR <sup>hk</sup> | NR <sup>hk</sup> | 10 | –  | NR | NR | –                                           | 15 RRMS <sup>i</sup> , 19 SCD    | (235) |
|        | ↓ | 19 <sup>h</sup>  | 1 <sup>h</sup>   | 20 | –  | NR | NR | 10 IFN-β or Corticosteroids                 | 19 SCD                           | (235) |
| IL-9   | ↔ | 8                | 2                | NR | NR | NR | NR | 9 Received Therapy <sup>d</sup>             | 10 MS, 6 LETM <sup>e</sup>       | (184) |
|        | ↔ | 31               | –                | 31 | –  | 25 | 6  | 19 Tx <sup>g</sup> , 15 PDN, 7 IFN-β        | 18 ONND                          | (230) |
|        | ↔ | 17               | 3                | 16 | 4  | 19 | 1  | 2 SP, 5 PDN, 1 IFN-β, 1 IVIG                | 26 RRMS, 9 PPMS, 18 OND          | (232) |
|        | ↓ | 31               | –                | 31 | –  | 25 | 6  | 19 Tx <sup>g</sup> , 15 PDN, 7 IFN-β        | 29 RRMS                          | (230) |
| IL-10  | ↑ | 31               | –                | 31 | –  | 25 | 6  | 19 Tx <sup>g</sup> , 15 PDN, 7 IFN-β        | 18 ONND                          | (230) |
|        | ↑ | 19 <sup>h</sup>  | 1 <sup>h</sup>   | 20 | –  | NR | NR | 10 IFN-β or Corticosteroids                 | 19 SCD                           | (235) |
|        | ↔ | 8                | 2                | NR | NR | NR | NR | 9 Received Therapy <sup>d</sup>             | 10 MS, 6 LETM <sup>e</sup>       | (184) |
|        | ↔ | 17               | –                | 17 | –  | 17 | –  | 2 IFN-β, 4 PDN, 1 PDN+C <sub>s</sub> A      | 21 RRMS, 21 OND                  | (228) |
|        | ↔ | 31               | –                | 31 | –  | 25 | 6  | 19 Tx <sup>g</sup> , 15 PDN, 7 IFN-β        | 29 RRMS                          | (230) |
|        | ↔ | 17               | 3                | 16 | 4  | 19 | 1  | 2 SP, 5 PDN, 1 IFN-β, 1 IVIG                | 26 RRMS, 9 PPMS, 18 OND          | (232) |
|        | ↔ | 19 <sup>h</sup>  | 1 <sup>h</sup>   | 20 | –  | NR | NR | 10 IFN-β or Corticosteroids                 | 20 RRMS                          | (235) |
|        | ↔ | NR <sup>hk</sup> | NR <sup>hk</sup> | 10 | –  | NR | NR | –                                           | 15 RRMS <sup>i</sup> , 19 SCD    | (235) |
|        | ↔ | 27               | 2                | 29 | –  | 24 | 5  | 15 Tx <sup>g</sup> , 14 PDN, 1 IFN-β, 1 AZA | 29 RRMS, 17 ONND, 10 OIND        | (241) |
|        | ↔ | 8                | 1                | –  | 9  | 8  | 1  | NR                                          | 8 L-NMOSD <sup>j</sup> , 13 RRMS | (245) |
| IL-12  | ↑ | 6                | 2                | 8  | –  | NR | NR | –                                           | 16 HC                            | (66)  |
|        | ↔ | 8                | 2                | NR | NR | NR | NR | 9 Received Therapy <sup>d</sup>             | 10 MS, 6 LETM <sup>e</sup>       | (184) |
|        | ↔ | 6                | 2                | 8  | –  | NR | NR | –                                           | 16 RRMS, 16 SPMS                 | (66)  |
|        | ↔ | 31               | –                | 31 | –  | 25 | 6  | 19 Tx <sup>g</sup> , 15 PDN, 7 IFN-β        | 29 RRMS, 18 ONND                 | (230) |
|        | ↔ | 17               | 3                | 16 | 4  | 19 | 1  | 2 SP, 5 PDN, 1 IFN-β, 1 IVIG                | 26 RRMS, 9 PPMS, 18 OND          | (232) |
|        | ↔ | 19 <sup>h</sup>  | 1 <sup>h</sup>   | 20 | –  | NR | NR | 10 IFN-β or Corticosteroids                 | 20 RRMS, 19 SCD                  | (235) |
|        | ↔ | NR <sup>hk</sup> | NR <sup>hk</sup> | 10 | –  | NR | NR | –                                           | 15 RRMS <sup>i</sup> , 19 SCD    | (235) |
|        | ↔ | 8                | 1                | –  | 9  | 8  | 1  | NR                                          | 8 L-NMOSD <sup>j</sup> , 13 RRMS | (245) |
| IL-13  | ↑ | 8                | 4                | 9  | 3  | NR | NR | –                                           | 24 RRMS, 24 SPMS, 24 OIND, 24 HC | (214) |
|        | ↑ | 31               | –                | 31 | –  | 25 | 6  | 19 Tx <sup>g</sup> , 15 PDN, 7 IFN-β        | 29 RRMS, 18 ONND                 | (230) |
|        | ↑ | 19 <sup>h</sup>  | 1 <sup>h</sup>   | 20 | –  | NR | NR | 10 IFN-β or Corticosteroids                 | 19 SCD                           | (235) |
|        | ↔ | 8                | 2                | NR | NR | NR | NR | 9 Received Therapy <sup>d</sup>             | 10 MS, 6 LETM <sup>e</sup>       | (184) |
|        | ↔ | 17               | 3                | 16 | 4  | 19 | 1  | 2 SP, 5 PDN, 1 IFN-β, 1 IVIG                | 26 RRMS, 9 PPMS, 18 OND          | (232) |
|        | ↔ | 19 <sup>h</sup>  | 1 <sup>h</sup>   | 20 | –  | NR | NR | 10 IFN-β or Corticosteroids                 | 20 RRMS                          | (235) |
|        | ↔ | NR <sup>hk</sup> | NR <sup>hk</sup> | 10 | –  | NR | NR | –                                           | 15 RRMS <sup>i</sup> , 19 SCD    | (235) |
| IL-15  | ↔ | 8                | 2                | NR | NR | NR | NR | 9 Received Therapy <sup>d</sup>             | 10 MS, 6 LETM <sup>e</sup>       | (184) |
|        | ↔ | 31               | –                | 31 | –  | 25 | 6  | 19 Tx <sup>g</sup> , 15 PDN, 7 IFN-β        | 29 RRMS, 18 ONND                 | (230) |
|        | ↔ | 17               | 3                | 16 | 4  | 19 | 1  | 2 SP, 5 PDN, 1 IFN-β, 1 IVIG                | 26 RRMS, 9 PPMS, 18 OND          | (232) |
| IL-17  | ↑ | 19 <sup>h</sup>  | 1 <sup>h</sup>   | 20 | –  | NR | NR | 10 IFN-β or Corticosteroids                 | 20 RRMS, 19 SCD                  | (235) |
|        | ↑ | NR <sup>hk</sup> | NR <sup>hk</sup> | 10 | –  | NR | NR | –                                           | 15 RRMS <sup>i</sup> , 19 SCD    | (235) |
|        | ↔ | 31               | –                | 31 | –  | 25 | 6  | 19 Tx <sup>g</sup> , 15 PDN, 7 IFN-β        | 29 RRMS, 18 ONND                 | (230) |
|        | ↔ | 13               | –                | 13 | –  | 13 | –  | 8 Immune Suppressed <sup>i</sup>            | 15 MS                            | (242) |
| IL-17A | ↑ | 17               | 3                | 16 | 4  | 19 | 1  | 2 SP, 5 PDN, 1 IFN-β, 1 IVIG                | 26 RRMS, 18 OND                  | (232) |
|        | ↑ | 16               | 6                | 22 | –  | 18 | 4  | –                                           | 18 RRMS, 14 ONND                 | (251) |
|        | ↔ | 8                | 2                | NR | NR | NR | NR | 9 Received Therapy <sup>d</sup>             | 10 MS, 6 LETM <sup>e</sup>       | (184) |
|        | ↔ | 31               | –                | 31 | –  | 25 | 6  | 19 Tx <sup>g</sup> , 15 PDN, 7 IFN-β        | 29 RRMS, 18 ONND                 | (230) |
|        | ↔ | 17               | 3                | 16 | 4  | 19 | 1  | 2 SP, 5 PDN, 1 IFN-β, 1 IVIG                | 9 PPMS                           | (232) |
|        | ↔ | 27               | 2                | 29 | –  | 24 | 5  | 15 Tx <sup>g</sup> , 14 PDN, 1 IFN-β, 1 AZA | 17 ONND, 10 OIND                 | (241) |
|        | ↓ | 27               | 2                | 29 | –  | 24 | 5  | 15 Tx <sup>g</sup> , 14 PDN, 1 IFN-β, 1 AZA | 29 RRMS                          | (241) |
| IL-17F | ↔ | 27               | 2                | 29 | –  | 24 | 5  | 15 Tx <sup>g</sup> , 14 PDN, 1 IFN-β, 1 AZA | 29 RRMS, 17 ONND, 10 OIND        | (241) |
| IL-21  | ↑ | 16               | 5                | 21 | –  | 21 | –  | –                                           | 16 ONND                          | (243) |
|        | ↔ | 27               | 2                | 29 | –  | 24 | 5  | 15 Tx <sup>g</sup> , 14 PDN, 1 IFN-β, 1 AZA | 29 RRMS, 17 ONND, 10 OIND        | (241) |
|        | ↔ | 16               | 5                | 21 | –  | 21 | –  | –                                           | 20 RRMS                          | (243) |
| IL-22  | ↔ | 27               | 2                | 29 | –  | 24 | 5  | 15 Tx <sup>g</sup> , 14 PDN, 1 IFN-β, 1 AZA | 29 RRMS, 17 ONND, 10 OIND        | (241) |
| IL-23  | ↔ | 31               | –                | 31 | –  | 25 | 6  | 19 Tx <sup>g</sup> , 15 PDN, 7 IFN-β        | 29 RRMS, 18 ONND                 | (230) |
|        | ↔ | 27               | 2                | 29 | –  | 24 | 5  | 15 Tx <sup>g</sup> , 14 PDN, 1 IFN-β, 1 AZA | 29 RRMS, 17 ONND, 10 OIND        | (241) |
| IL-25  | ↔ | 27               | 2                | 29 | –  | 24 | 5  | 15 Tx <sup>g</sup> , 14 PDN, 1 IFN-β, 1 AZA | 29 RRMS, 17 ONND, 10 OIND        | (241) |
| IL-27  | ↔ | 37               | 8                | NR | NR | 36 | 9  | PDN, <sup>f</sup> AZA <sup>f</sup>          | 19 ONND, 40 HC                   | (253) |

|                                   |   |                  |                  |    |    |    |    |                                             |                                                 |       |
|-----------------------------------|---|------------------|------------------|----|----|----|----|---------------------------------------------|-------------------------------------------------|-------|
| IL-31                             | ↔ | 27               | 2                | 29 | –  | 24 | 5  | 15 Tx <sup>g</sup> , 14 PDN, 1 IFN-β, 1 AZA | 29 RRMS, 17 ONND, 10 OIND                       | (241) |
| IL-33                             | ↔ | 27               | 2                | 29 | –  | 24 | 5  | 15 Tx <sup>g</sup> , 14 PDN, 1 IFN-β, 1 AZA | 29 RRMS, 17 ONND, 10 OIND                       | (241) |
| IL-35                             | ↔ | 37               | 8                | NR | NR | 36 | 9  | PDN, <sup>f</sup> AZA <sup>f</sup>          | 19 ONND, 40 HC                                  | (253) |
| Interferon-γ                      | ↔ | 8                | 2                | NR | NR | NR | NR | 9 Received Therapy <sup>d</sup>             | 10 MS, 6 LETM <sup>e</sup>                      | (184) |
|                                   | ↔ | 17               | –                | 17 | –  | 17 | –  | 2 IFN-β, 4 PDN, 1 PDN+CsA                   | 21 RRMS, 21 OND                                 | (228) |
|                                   | ↔ | 31               | –                | 31 | –  | 25 | 6  | 19 Tx <sup>g</sup> , 15 PDN, 7 IFN-β        | 29 RRMS, 18 ONND                                | (230) |
|                                   | ↔ | 17               | 3                | 16 | 4  | 19 | 1  | 2 SP, 5 PDN, 1 IFN-β, 1 IVIG                | 26 RRMS, 9 PPMS, 18 OND                         | (232) |
|                                   | ↔ | 19 <sup>h</sup>  | 1 <sup>h</sup>   | 20 | –  | NR | NR | 10 IFN-β or Corticosteroids                 | 20 RRMS, 19 SCD                                 | (235) |
|                                   | ↔ | NR <sup>hk</sup> | NR <sup>hk</sup> | 10 | –  | NR | NR | –                                           | 15 RRMS <sup>i</sup> , 19 SCD                   | (235) |
|                                   | ↔ | 27               | 2                | 29 | –  | 24 | 5  | 15 Tx <sup>g</sup> , 14 PDN, 1 IFN-β, 1 AZA | 29 RRMS, 17 ONND, 10 OIND                       | (241) |
|                                   | ↔ | 8                | 1                | –  | 9  | 8  | 1  | NR                                          | 8 L-NMOSD <sup>j</sup> , 13 RRMS                | (245) |
|                                   | ↔ | 8                | 1                | –  | 9  | 8  | 1  | NR                                          | 8 L-NMOSD <sup>j</sup> , 13 RRMS                | (245) |
| Maltose binding protein           | ↑ | 8                | 1                | 9  | –  | 6  | 3  | 3 Corticosteroids                           | 9 ONND                                          | (234) |
|                                   | ↑ | 33               | –                | 33 | –  | 33 | –  | 8 methyl-PDN                                | 12 OND                                          | (237) |
|                                   | ↔ | 8                | 1                | 9  | –  | 6  | 3  | 3 Corticosteroids                           | 9 MS                                            | (234) |
|                                   | ↔ | 33               | –                | 33 | –  | 33 | –  | 8 methyl-PDN                                | 27 MS, 6 ADEM, 5 NB, 9 Meningitis, 3 SI         | (237) |
| MMP-1                             | ↔ | 27               | 2                | 29 | –  | 24 | 5  | 15 Tx <sup>g</sup> , 14 PDN, 1 IFN-β, 1 AZA | 29 RRMS, 17 ONND, 10 OIND                       | (241) |
| MMP-2                             | ↑ | 27               | 2                | 29 | –  | 24 | 5  | 15 Tx <sup>g</sup> , 14 PDN, 1 IFN-β, 1 AZA | 29 RRMS, 17 ONND, 10 OIND                       | (241) |
| MMP-3                             | ↔ | 27               | 2                | 29 | –  | 24 | 5  | 15 Tx <sup>g</sup> , 14 PDN, 1 IFN-β, 1 AZA | 29 RRMS, 17 ONND, 10 OIND                       | (241) |
| MMP-4                             | ↔ | 27               | 2                | 29 | –  | 24 | 5  | 15 Tx <sup>g</sup> , 14 PDN, 1 IFN-β, 1 AZA | 29 RRMS, 17 ONND, 10 OIND                       | (241) |
| MMP-5                             | ↔ | 27               | 2                | 29 | –  | 24 | 5  | 15 Tx <sup>g</sup> , 14 PDN, 1 IFN-β, 1 AZA | 29 RRMS, 17 ONND, 10 OIND                       | (241) |
| MMP-6                             | ↔ | 27               | 2                | 29 | –  | 24 | 5  | 15 Tx <sup>g</sup> , 14 PDN, 1 IFN-β, 1 AZA | 29 RRMS, 17 ONND, 10 OIND                       | (241) |
| MMP-7                             | ↔ | 27               | 2                | 29 | –  | 24 | 5  | 15 Tx <sup>g</sup> , 14 PDN, 1 IFN-β, 1 AZA | 29 RRMS, 17 ONND, 10 OIND                       | (241) |
| MMP-8                             | ↔ | 27               | 2                | 29 | –  | 24 | 5  | 15 Tx <sup>g</sup> , 14 PDN, 1 IFN-β, 1 AZA | 29 RRMS, 17 ONND, 10 OIND                       | (241) |
| MMP-9                             | ↔ | 27               | 2                | 29 | –  | 24 | 5  | 15 Tx <sup>g</sup> , 14 PDN, 1 IFN-β, 1 AZA | 29 RRMS, 17 ONND, 10 OIND                       | (241) |
|                                   | ↔ | 13               | –                | 13 | –  | 13 | –  | 8 Immune Suppressed <sup>i</sup>            | 15 MS                                           | (242) |
| NF heavy chain                    | ↑ | 8                | 1                | 9  | –  | 6  | 3  | 3 Corticosteroids                           | 9 MS, 9 ONND                                    | (234) |
|                                   | ↑ | 16               | 6                | 22 | –  | NR | NR | –                                           | 14 ONND                                         | (248) |
|                                   | ↔ | 33               | –                | 33 | –  | 33 | –  | 8 methyl-PDN                                | 27 MS, 12 OND, 6 ADEM, 5 NB, 9 Meningitis, 3 SI | (237) |
|                                   | ↔ | 16               | 6                | 22 | –  | NR | NR | –                                           | 18 RRMS                                         | (248) |
| NF light chain                    | ↑ | 16               | 6                | 22 | –  | NR | NR | –                                           | 18 RRMS, 14 ONND                                | (248) |
| Platelet derived growth factor-BB | ↑ | 14               | 4                | 18 | –  | NR | NR | –                                           | 15 ONND                                         | (247) |
|                                   | ↔ | 8                | 2                | NR | NR | NR | NR | 9 Received Therapy <sup>d</sup>             | 10 MS, 6 LETM <sup>e</sup>                      | (184) |
|                                   | ↔ | 31               | –                | 31 | –  | 25 | 6  | 19 Tx <sup>g</sup> , 15 PDN, 7 IFN-β        | 29 RRMS, 18 ONND                                | (230) |
|                                   | ↔ | 17               | 3                | 16 | 4  | 19 | 1  | 2 SP, 5 PDN, 1 IFN-β, 1 IVIG                | 26 RRMS, 9 PPMS, 18 OND                         | (232) |
|                                   | ↔ | 14               | 4                | 18 | –  | NR | NR | –                                           | 17 i-ON                                         | (247) |
| Resistin                          | ↑ | 47               | 9                | 56 | –  | 44 | 12 | –                                           | 12 ONND                                         | (255) |
| S100 calcium-binding protein B    | ↑ | 33               | –                | 33 | –  | 33 | –  | 8 methyl-PDN                                | 27 MS, 12 OND, 5 NB                             | (237) |
|                                   | ↑ | 10               | –                | 10 | –  | 10 | –  | NR                                          | 10 MS, 5 ONND, 3 ADEM, 3 SI                     | (249) |
|                                   | ↔ | 8                | 2                | NR | NR | NR | NR | 9 Received Therapy <sup>d</sup>             | 10 MS, 6 LETM <sup>e</sup>                      | (184) |
|                                   | ↔ | 33               | –                | 33 | –  | 33 | –  | 8 methyl-PDN                                | 6 ADEM, 9 Meningitis, 3 SI                      | (237) |
| sCD40L                            | ↑ | 27               | 2                | 29 | –  | 24 | 5  | 15 Tx <sup>g</sup> , 1 AZA, 14 PDN, 1 IFN-β | 10 OIND, 17 ONND                                | (72)  |
|                                   | ↔ | 27               | 2                | 29 | –  | 24 | 5  | 15 Tx <sup>g</sup> , 1 AZA, 14 PDN, 1 IFN-β | 29 MS                                           | (72)  |
| sICAM-1                           | ↑ | 25               | –                | 25 | –  | 19 | 6  | 12 PDN                                      | 21 RRMS, 20 ONND                                | (238) |
| sIL-6R                            | ↑ | 16               | 6                | 22 | –  | 18 | 4  | –                                           | 18 MS, 14 ONND                                  | (231) |
| sRAGE                             | ↔ | 8                | 2                | NR | NR | NR | NR | 9 Received Therapy <sup>d</sup>             | 10 MS, 6 LETM <sup>e</sup>                      | (184) |
| sVCAM-1                           | ↑ | 25               | –                | 25 | –  | 19 | 6  | 12 PDN                                      | 21 RRMS, 20 ONND                                | (238) |
| TGF-β                             | ↔ | 31               | –                | 31 | –  | 25 | 6  | 19 Tx <sup>g</sup> , 15 PDN, 7 IFN-β        | 29 RRMS, 18 ONND                                | (230) |
| TIMP-1                            | ↑ | 27               | 2                | 29 | –  | 24 | 5  | 15 Tx <sup>g</sup> , 14 PDN, 1 IFN-β, 1 AZA | 29 RRMS, 17 ONND, 10 OIND                       | (241) |
|                                   | ↑ | 13               | –                | 13 | –  | 13 | –  | 8 Immune Suppressed <sup>i</sup>            | 15 MS                                           | (242) |
| TIMP-2                            | ↔ | 27               | 2                | 29 | –  | 24 | 5  | 15 Tx <sup>g</sup> , 14 PDN, 1 IFN-β, 1 AZA | 29 RRMS, 17 ONND, 10 OIND                       | (241) |
| TIMP-3                            | ↔ | 27               | 2                | 29 | –  | 24 | 5  | 15 Tx <sup>g</sup> , 14 PDN, 1 IFN-β, 1 AZA | 29 RRMS, 17 ONND, 10 OIND                       | (241) |
| TIMP-4                            | ↔ | 27               | 2                | 29 | –  | 24 | 5  | 15 Tx <sup>g</sup> , 14 PDN, 1 IFN-β, 1 AZA | 29 RRMS, 17 ONND, 10 OIND                       | (241) |
|                                   | ↑ | 19 <sup>h</sup>  | 1 <sup>h</sup>   | 20 | –  | NR | NR | 10 IFN-β or Corticosteroids                 | 20 SCD                                          | (235) |
|                                   | ↔ | 8                | 2                | NR | NR | NR | NR | 9 Received Therapy <sup>d</sup>             | 10 MS, 6 LETM <sup>e</sup>                      | (184) |

|                                    |   |                  |                  |    |    |    |    |                                                     |                                          |       |
|------------------------------------|---|------------------|------------------|----|----|----|----|-----------------------------------------------------|------------------------------------------|-------|
| Tissue Necrosis                    | ↔ | 17               | –                | 17 | –  | 17 | –  | 2 IFN- $\beta$ , 4 PDN, 1 PDN+CsA                   | 21 RRMS, 21 OND                          | (228) |
| Factor- $\alpha$                   | ↔ | 31               | –                | 31 | –  | 25 | 6  | 19 Tx <sup>g</sup> , 15 PDN, 7 IFN- $\beta$         | 18 ONND                                  | (230) |
|                                    | ↔ | 17               | 3                | 16 | 4  | 19 | 1  | 2 SP, 5 PDN, 1 IFN- $\beta$ , 1 IVIG                | 26 RRMS, 9 PPMS, 18 OND                  | (232) |
|                                    | ↔ | 19 <sup>h</sup>  | 1 <sup>h</sup>   | 20 | –  | NR | NR | 10 IFN- $\beta$ or Corticosteroids                  | 20 RRMS                                  | (235) |
|                                    | ↔ | NR <sup>hk</sup> | NR <sup>hk</sup> | 10 | –  | NR | NR | –                                                   | 15 RRMS <sup>i</sup> , 19 SCD            | (235) |
|                                    | ↔ | 27               | 2                | 29 | –  | 24 | 5  | 15 Tx <sup>g</sup> , 14 PDN, 1 IFN- $\beta$ , 1 AZA | 29 RRMS, 17 ONND, 10 OIND                | (241) |
|                                    | ↔ | 8                | 1                | –  | 9  | 8  | 1  | NR                                                  | 8 L-NMOSD <sup>j</sup> , 13 RRMS         | (245) |
|                                    | ↔ | 18 <sup>m</sup>  | 2 <sup>m</sup>   | 20 | –  | 20 | –  | NR                                                  | 20 NMOSD with Poor Recovery <sup>n</sup> | (246) |
|                                    | ↓ | 31               | –                | 31 | –  | 25 | 6  | 19 Tx <sup>g</sup> , 15 PDN, 7 IFN- $\beta$         | 29 RRMS                                  | (230) |
| Vascular endothelial growth factor | ↔ | 8                | 2                | NR | NR | NR | NR | 9 Received Therapy <sup>d</sup>                     | 10 MS, 6 LETM <sup>e</sup>               | (184) |
|                                    | ↔ | 31               | –                | 31 | –  | 25 | 6  | 19 Tx <sup>g</sup> , 15 PDN, 7 IFN- $\beta$         | 18 ONND                                  | (230) |
|                                    | ↔ | 17               | 3                | 16 | 4  | 19 | 1  | 2 SP, 5 PDN, 1 IFN- $\beta$ , 1 IVIG                | 26 RRMS, 9 PPMS, 18 OND                  | (232) |

ADEM, acute disseminated encephalomyelitis; AD, Alzheimer's disease; AMCase, acidic mammalian chitinase; APRIL, a proliferation-inducing ligand; AQP4-Ab, aquaporin-4 Antibody; AZA, azathioprine; C5b-9, terminal complement complex; CCL, chemokine (C-C motif) ligand; CHI3L1, chitinase-3-like protein 1; ChT, chitotriosidase; CNS, central nervous system; CNS VD, central nervous system vascular disorders; CsA, Cyclosporin A; CXCL, chemokine (C-X-C motif) ligand; DBP, vitamin D binding protein; ECP, eosinophil cationic protein; GDNF, glial cell line-derived neurotrophic factor; HC, healthy control; i-encephalitis, idiopathic encephalitis; IFN- $\beta$ , interferon- $\beta$ ; IL, interleukin; IL-1Ra, interleukin-1 receptor antagonist; i-myelitis, idiopathic myelitis; i-ON, idiopathic optic neuritis; IVIG, intravenous immunoglobulin; LAP, relapse; LETM, longitudinally extensive transverse myelitis; L-NMOSD, limited neuromyelitis optica spectrum disorder; MBP, maltose binding protein; MMP, matrix metalloproteinase; MS, multiple sclerosis; NB, neuro-Behçet disease; NDD, neurodegenerative disease; NF, neurofilament; NMOSD, neuromyelitis optica spectrum disorder; NR, Not reported; OIND, other inflammatory neurologic disorders; ON, optic neuritis; OND, other neurologic disorders; ONND, other non-inflammatory neurologic disorders; PDN, prednisolone; PPMS, primary progressive multiple sclerosis; RRMS, relapsing remitting multiple sclerosis; SCD, spinocerebellar degeneration; sCD40L, soluble CD40 ligand; SI, spinal infarct; sICAM-1, soluble intercellular adhesion molecule 1; sIL-6R, soluble interleukin-6 receptor; SP, steroid pulse; SPMS, secondary progressive multiple sclerosis; sRAGE, soluble receptor for advanced glycation end-products; sVCAM-1, soluble vascular cell adhesion molecule 1; TGF- $\beta$ , transforming growth factor- $\beta$ ; TIMP, tissue inhibitor of metalloproteinases; TM, transverse myelitis; Tx, treatment.

<sup>a</sup> Differentiates between NMOSD patient disease status at time of biopsy sampling, not between monophasic vs. relapsing-remitting forms of disease.

<sup>b</sup> Defines preventative treatments provided during patient's remitting period of disease, not for treatment of acute relapse. Patients not receiving treatment during remission were omitted from this column.

<sup>c</sup> If multiple groups are listed, there was statistical significance reported between the study group and both comparison groups.

<sup>d</sup> Nine of the 10 NMOSD patients sampled were receiving therapeutic interventions prior to sampling, the specifics of which were not reported.

<sup>e</sup> Patients were seronegative for AQP4-IgG & MOG-IgG.

<sup>f</sup> The exact number and subset of patients taking medication was not reported.

<sup>g</sup> This study did not specify between patients receiving monotherapy or combination therapy.

<sup>h</sup> The study cohort was comprised of opticospinal MS patients, who have since been subclassified beneath the NMOSD spectrum.

<sup>i</sup> Patients received at least one immunomodulatory therapy, such as corticosteroids, azathioprine, methylprednisolone pulse therapy, or IFN- $\beta$ .

<sup>j</sup> Limited NMOSD patients either had ON with AQP4-IgG seropositivity without brain, brainstem, or spinal cord lesions; or had myelitis with AQP4-IgG seropositivity without ON.

<sup>k</sup> This study cohort consisted of the 10 opticospinal MS patients who did not receive any immunomodulating therapies to treat their OSMS, however, the sex distribution of this study subgroup was not reported.

<sup>l</sup> Patients did not receive any immunomodulating therapies.

<sup>m</sup> Patients were diagnosed with NMOSD and had good recovery (defined as visual acuity score increasing at least 3 points) two months after an acute relapse with treatment on high dose methylprednisolone.

<sup>n</sup> Patients were diagnosed with NMOSD and had poor recovery (defined as visual acuity score increasing by less than 3 points) two months after an acute relapse with treatment on high dose methylprednisolone.
