# Supplementary material for: Metabolomic Profiling in Neuromyelitis Optica Spectrum Disorder Biomarker Discovery
Source: MDPI journal article supplement (doi:10.3390/metabo10090374), 2020-09-18
Supplement: s1 [file s1]

**SupplementaryTable 1. Altered Protein and Lipoprotein Outcomes in NMOSD Proteomic Studies.**

| Endpoint                         | Shift | Biopsy           | NMOSD Cohort   |                | Disease State at Biopsy <sup>a</sup> |           | AQP4-Ab Serology |    | Control                | Method <sup>c</sup> | Ref.  |
|----------------------------------|-------|------------------|----------------|----------------|--------------------------------------|-----------|------------------|----|------------------------|---------------------|-------|
|                                  |       |                  | Female         | Male           | Relapse                              | Remission | +                | -  |                        |                     |       |
| Actin- $\alpha$ 1                | ↑     | CSF <sup>d</sup> | 8 <sup>e</sup> | 2 <sup>e</sup> | NR                                   | NR        | NR               | NR | 12 LETM <sup>f,g</sup> | HR LTQ-Orbitrap MS  | (184) |
| AEBP1                            | ↓     | CSF <sup>d</sup> | 8 <sup>e</sup> | 2 <sup>e</sup> | NR                                   | NR        | NR               | NR | 12 LETM <sup>f,g</sup> | HR LTQ-Orbitrap MS  | (184) |
| $\alpha$ 1- $\beta$ glycoprotein | ↓     | CSF              | 6              | 3              | 9                                    | —         | NR               | NR | 9 OND                  | 2-DE & MALDI-TOF-MS | (187) |
| $\alpha$ 1-acid glycoprotein     | ↓     | CSF <sup>d</sup> | 8 <sup>e</sup> | 2 <sup>e</sup> | NR                                   | NR        | NR               | NR | 12 LETM <sup>f,g</sup> | HR LTQ-Orbitrap MS  | (184) |
| $\alpha$ 1-antichymotrypsin      | ↓     | CSF <sup>d</sup> | 8 <sup>e</sup> | 2 <sup>e</sup> | NR                                   | NR        | NR               | NR | 12 LETM <sup>f,g</sup> | HR LTQ-Orbitrap MS  | (184) |
| $\alpha$ 1-antitrypsin           | ↓     | CSF <sup>d</sup> | 8 <sup>e</sup> | 2 <sup>e</sup> | NR                                   | NR        | NR               | NR | 12 LETM <sup>f,g</sup> | HR LTQ-Orbitrap MS  | (184) |
| $\alpha$ 2-macroglobulin         | ↑     | CSF <sup>d</sup> | 8 <sup>e</sup> | 2 <sup>e</sup> | NR                                   | NR        | NR               | NR | 12 LETM <sup>f,g</sup> | HR LTQ-Orbitrap MS  | (184) |
| Albumin                          | ↓     | CSF <sup>d</sup> | 8 <sup>e</sup> | 2 <sup>e</sup> | NR                                   | NR        | NR               | NR | 12 LETM <sup>f,g</sup> | HR LTQ-Orbitrap MS  | (184) |
| Amyloid-like protein 1           | ↓     | CSF <sup>d</sup> | 8 <sup>e</sup> | 2 <sup>e</sup> | NR                                   | NR        | NR               | NR | 12 LETM <sup>f,g</sup> | HR LTQ-Orbitrap MS  | (184) |
| Angiotensinogen                  | ↓     | CSF <sup>d</sup> | 8 <sup>e</sup> | 2 <sup>e</sup> | NR                                   | NR        | NR               | NR | 12 LETM <sup>f,g</sup> | HR LTQ-Orbitrap MS  | (184) |
| Antithrombin III                 | ↓     | CSF <sup>d</sup> | 8 <sup>e</sup> | 2 <sup>e</sup> | NR                                   | NR        | NR               | NR | 12 LETM <sup>f,g</sup> | HR LTQ-Orbitrap MS  | (184) |
| Apolipoprotein A-I               | ↓     | CSF <sup>d</sup> | 8 <sup>e</sup> | 2 <sup>e</sup> | NR                                   | NR        | NR               | NR | 12 LETM <sup>f,g</sup> | HR LTQ-Orbitrap MS  | (184) |
|                                  | ↓     | CSF              | 4              | 2              | 6                                    | —         | NR               | NR | 6 OND                  | 2-DE & MALDI-TOF-MS | (188) |
| Apolipoprotein A-II              | ↓     | CSF <sup>d</sup> | 8 <sup>e</sup> | 2 <sup>e</sup> | NR                                   | NR        | NR               | NR | 12 LETM <sup>f,g</sup> | HR LTQ-Orbitrap MS  | (184) |
| Apolipoprotein A-IV              | ↓     | CSF <sup>d</sup> | 8 <sup>e</sup> | 2 <sup>e</sup> | NR                                   | NR        | NR               | NR | 12 LETM <sup>f,g</sup> | HR LTQ-Orbitrap MS  | (184) |
|                                  | ↓     | CSF              | 6              | 3              | 9                                    | —         | NR               | NR | 9 OND                  | 2-DE & MALDI-TOF-MS | (187) |
| Apolipoprotein B-100             | ↑     | CSF <sup>d</sup> | 8 <sup>e</sup> | 2 <sup>e</sup> | NR                                   | NR        | NR               | NR | 12 LETM <sup>f,g</sup> | HR LTQ-Orbitrap MS  | (184) |
| Apolipoprotein D                 | ↓     | CSF <sup>d</sup> | 8 <sup>e</sup> | 2 <sup>e</sup> | NR                                   | NR        | NR               | NR | 12 LETM <sup>f,g</sup> | HR LTQ-Orbitrap MS  | (184) |
| Apolipoprotein E                 | ↓     | CSF <sup>d</sup> | 8 <sup>e</sup> | 2 <sup>e</sup> | NR                                   | NR        | NR               | NR | 12 LETM <sup>f,g</sup> | HR LTQ-Orbitrap MS  | (184) |
|                                  | ↓     | CSF              | 6              | 3              | 9                                    | —         | NR               | NR | 9 OND                  | 2-DE & MALDI-TOF-MS | (187) |
|                                  | ↓     | CSF              | 4              | 2              | 6                                    | —         | NR               | NR | 6 OND                  | 2-DE & MALDI-TOF-MS | (188) |
| Attractin                        | ↓     | Urine            | 28             | 4              | —                                    | 32        | 32               | —  | 31 HC                  | LC-MS/MS            | (189) |
| $\beta$ -Ala-His Dipeptidase     | ↓     | CSF <sup>d</sup> | 8 <sup>e</sup> | 2 <sup>e</sup> | NR                                   | NR        | NR               | NR | 12 LETM <sup>f,g</sup> | HR LTQ-Orbitrap MS  | (184) |
| $\beta$ -Mannosidase             | ↓     | Urine            | 28             | 4              | —                                    | 32        | 32               | —  | 31 HC                  | LC-MS/MS            | (189) |
| Bile salt-activated lipase       | ↓     | Urine            | 28             | 4              | —                                    | 32        | 32               | —  | 31 HC                  | LC-MS/MS            | (189) |
| C1 esterase inhibitor            | ↓     | CSF <sup>d</sup> | 8 <sup>e</sup> | 2 <sup>e</sup> | NR                                   | NR        | NR               | NR | 12 LETM <sup>f,g</sup> | HR LTQ-Orbitrap MS  | (184) |
| C4BP $\alpha$                    | ↑     | CSF <sup>d</sup> | 8 <sup>e</sup> | 2 <sup>e</sup> | NR                                   | NR        | NR               | NR | 12 LETM <sup>f,g</sup> | HR LTQ-Orbitrap MS  | (184) |
| CACNA2D2                         | ↓     | CSF <sup>d</sup> | 8 <sup>e</sup> | 2 <sup>e</sup> | NR                                   | NR        | NR               | NR | 12 LETM <sup>f,g</sup> | HR LTQ-Orbitrap MS  | (184) |
| Cadherin-2                       | ↓     | Urine            | 28             | 4              | —                                    | 32        | 32               | —  | 46 RRMS, 31 HC         | LC-MS/MS            | (189) |
| Cadherin-19                      | ↓     | Urine            | 28             | 4              | —                                    | 32        | 32               | —  | 31 HC                  | LC-MS/MS            | (189) |
| Calsyntenin-1                    | ↓     | CSF <sup>d</sup> | 8 <sup>e</sup> | 2 <sup>e</sup> | NR                                   | NR        | NR               | NR | 12 LETM <sup>f,g</sup> | HR LTQ-Orbitrap MS  | (184) |
| Carboxypeptidase E               | ↓     | CSF <sup>d</sup> | 8 <sup>e</sup> | 2 <sup>e</sup> | NR                                   | NR        | NR               | NR | 12 LETM <sup>f,g</sup> | HR LTQ-Orbitrap MS  | (184) |
| Cathepsin D                      | ↓     | CSF <sup>d</sup> | 8 <sup>e</sup> | 2 <sup>e</sup> | NR                                   | NR        | NR               | NR | 12 LETM <sup>f,g</sup> | HR LTQ-Orbitrap MS  | (184) |
| CD9                              | ↓     | Urine            | 28             | 4              | —                                    | 32        | 32               | —  | 31 HC                  | LC-MS/MS            | (189) |
| CD84                             | ↓     | Urine            | 28             | 4              | —                                    | 32        | 32               | —  | 31 HC                  | LC-MS/MS            | (189) |
| Ceruloplasmin                    | ↑     | CSF <sup>d</sup> | 8 <sup>e</sup> | 2 <sup>e</sup> | NR                                   | NR        | NR               | NR | 12 LETM <sup>f,g</sup> | HR LTQ-Orbitrap MS  | (184) |
| Chitinase-3-like protein         | ↑     | CSF <sup>d</sup> | 8 <sup>e</sup> | 2 <sup>e</sup> | NR                                   | NR        | NR               | NR | 12 LETM <sup>f,g</sup> | HR LTQ-Orbitrap MS  | (184) |
| CHL1                             | ↓     | CSF <sup>d</sup> | 8 <sup>e</sup> | 2 <sup>e</sup> | NR                                   | NR        | NR               | NR | 12 LETM <sup>f,g</sup> | HR LTQ-Orbitrap MS  | (184) |
| CHMP5                            | ↓     | Urine            | 28             | 4              | —                                    | 32        | 32               | —  | 31 HC                  | LC-MS/MS            | (189) |
| Chromogranin A                   | ↓     | CSF <sup>d</sup> | 8 <sup>e</sup> | 2 <sup>e</sup> | NR                                   | NR        | NR               | NR | 12 LETM <sup>f,g</sup> | HR LTQ-Orbitrap MS  | (184) |
| Clusterin                        | ↓     | CSF <sup>d</sup> | 8 <sup>e</sup> | 2 <sup>e</sup> | NR                                   | NR        | NR               | NR | 12 LETM <sup>f,g</sup> | HR LTQ-Orbitrap MS  | (184) |
| Collagen $\alpha$ 1, type I      | ↓     | CSF <sup>d</sup> | 8 <sup>e</sup> | 2 <sup>e</sup> | NR                                   | NR        | NR               | NR | 12 LETM <sup>f,g</sup> | HR LTQ-Orbitrap MS  | (184) |
| Collagen $\alpha$ 1, type IV     | ↓     | CSF <sup>d</sup> | 8 <sup>e</sup> | 2 <sup>e</sup> | NR                                   | NR        | NR               | NR | 12 LETM <sup>f,g</sup> | HR LTQ-Orbitrap MS  | (184) |
| Collagen $\alpha$ 1, type XVIII  | ↓     | CSF <sup>d</sup> | 8 <sup>e</sup> | 2 <sup>e</sup> | NR                                   | NR        | NR               | NR | 12 LETM <sup>f,g</sup> | HR LTQ-Orbitrap MS  | (184) |
|                                  | ↓     | Urine            | 28             | 4              | —                                    | 32        | 32               | —  | 31 HC                  | LC-MS/MS            | (189) |
| Complement C1q                   | ↑     | CSF <sup>d</sup> | 8 <sup>e</sup> | 2 <sup>e</sup> | NR                                   | NR        | NR               | NR | 12 LETM <sup>f,g</sup> | HR LTQ-Orbitrap MS  | (184) |
| Complement C1r                   | ↑     | CSF <sup>d</sup> | 8 <sup>e</sup> | 2 <sup>e</sup> | NR                                   | NR        | NR               | NR | 12 LETM <sup>f,g</sup> | HR LTQ-Orbitrap MS  | (184) |
| Complement C1s                   | ↑     | CSF <sup>d</sup> | 8 <sup>e</sup> | 2 <sup>e</sup> | NR                                   | NR        | NR               | NR | 12 LETM <sup>f,g</sup> | HR LTQ-Orbitrap MS  | (184) |
| Complement C3                    | ↑     | CSF <sup>d</sup> | 8 <sup>e</sup> | 2 <sup>e</sup> | NR                                   | NR        | NR               | NR | 12 LETM <sup>f,g</sup> | HR LTQ-Orbitrap MS  | (184) |
| Complement C4                    | ↑     | CSF <sup>d</sup> | 8 <sup>e</sup> | 2 <sup>e</sup> | NR                                   | NR        | NR               | NR | 12 LETM <sup>f,g</sup> | HR LTQ-Orbitrap MS  | (184) |
| Complement C5                    | ↑     | CSF <sup>d</sup> | 8 <sup>e</sup> | 2 <sup>e</sup> | NR                                   | NR        | NR               | NR | 12 LETM <sup>f,g</sup> | HR LTQ-Orbitrap MS  | (184) |
| Complement C6                    | ↑     | CSF <sup>d</sup> | 8 <sup>e</sup> | 2 <sup>e</sup> | NR                                   | NR        | NR               | NR | 12 LETM <sup>f,g</sup> | HR LTQ-Orbitrap MS  | (184) |
| Complement C7                    | ↑     | CSF <sup>d</sup> | 8 <sup>e</sup> | 2 <sup>e</sup> | NR                                   | NR        | NR               | NR | 12 LETM <sup>f,g</sup> | HR LTQ-Orbitrap MS  | (184) |

|                                     |   |                  |                |                |    |    |    |    |                        |                     |       |
|-------------------------------------|---|------------------|----------------|----------------|----|----|----|----|------------------------|---------------------|-------|
| Complement C8 $\beta$               | ↑ | CSF <sup>d</sup> | 8 <sup>e</sup> | 2 <sup>e</sup> | NR | NR | NR | NR | 12 LETM <sup>f,g</sup> | HR LTQ-Orbitrap MS  | (184) |
| Complement C8 $\gamma$              | ↑ | CSF <sup>d</sup> | 8 <sup>e</sup> | 2 <sup>e</sup> | NR | NR | NR | NR | 12 LETM <sup>f,g</sup> | HR LTQ-Orbitrap MS  | (184) |
| Complement C9                       | ↑ | CSF <sup>d</sup> | 8 <sup>e</sup> | 2 <sup>e</sup> | NR | NR | NR | NR | 12 LETM <sup>f,g</sup> | HR LTQ-Orbitrap MS  | (184) |
| Contactin-1                         | ↓ | CSF <sup>d</sup> | 8 <sup>e</sup> | 2 <sup>e</sup> | NR | NR | NR | NR | 12 LETM <sup>f,g</sup> | HR LTQ-Orbitrap MS  | (184) |
|                                     | ↓ | Urine            | 28             | 4              | —  | 32 | 32 | —  | 31 HC                  | LC-MS/MS            | (189) |
| Cystatin-C                          | ↓ | CSF <sup>d</sup> | 8 <sup>e</sup> | 2 <sup>e</sup> | NR | NR | NR | NR | 12 LETM <sup>f,g</sup> | HR LTQ-Orbitrap MS  | (184) |
| DKK3                                | ↓ | CSF <sup>d</sup> | 8 <sup>e</sup> | 2 <sup>e</sup> | NR | NR | NR | NR | 12 LETM <sup>f,g</sup> | HR LTQ-Orbitrap MS  | (184) |
| Factor H                            | ↑ | CSF <sup>d</sup> | 8 <sup>e</sup> | 2 <sup>e</sup> | NR | NR | NR | NR | 12 LETM <sup>f,g</sup> | HR LTQ-Orbitrap MS  | (184) |
| FAM3C                               | ↓ | CSF <sup>d</sup> | 8 <sup>e</sup> | 2 <sup>e</sup> | NR | NR | NR | NR | 12 LETM <sup>f,g</sup> | HR LTQ-Orbitrap MS  | (184) |
| FGFR1                               | ↓ | Urine            | 28             | 4              | —  | 32 | 32 | —  | 31 HC                  | LC-MS/MS            | (189) |
| Fibrinogen $\alpha$                 | ↑ | CSF <sup>d</sup> | 8 <sup>e</sup> | 2 <sup>e</sup> | NR | NR | NR | NR | 12 LETM <sup>f,g</sup> | HR LTQ-Orbitrap MS  | (184) |
| Fibrinogen $\beta$                  | ↑ | CSF <sup>d</sup> | 8 <sup>e</sup> | 2 <sup>e</sup> | NR | NR | NR | NR | 12 LETM <sup>f,g</sup> | HR LTQ-Orbitrap MS  | (184) |
| Fibrinogen $\gamma$                 | ↑ | CSF <sup>d</sup> | 8 <sup>e</sup> | 2 <sup>e</sup> | NR | NR | NR | NR | 12 LETM <sup>f,g</sup> | HR LTQ-Orbitrap MS  | (184) |
|                                     | ↓ | CSF              | 6              | 3              | 9  | —  | NR | NR | 9 OND                  | 2-DE & MALDI-TOF-MS | (187) |
| Fibronectin                         | ↓ | CSF <sup>d</sup> | 8 <sup>e</sup> | 2 <sup>e</sup> | NR | NR | NR | NR | 12 LETM <sup>f,g</sup> | HR LTQ-Orbitrap MS  | (184) |
| Fibulin-1                           | ↓ | CSF <sup>d</sup> | 8 <sup>e</sup> | 2 <sup>e</sup> | NR | NR | NR | NR | 12 LETM <sup>f,g</sup> | HR LTQ-Orbitrap MS  | (184) |
| Ficolin-3                           | ↑ | CSF <sup>d</sup> | 8 <sup>e</sup> | 2 <sup>e</sup> | NR | NR | NR | NR | 12 LETM <sup>f,g</sup> | HR LTQ-Orbitrap MS  | (184) |
| Follistatin-like 1                  | ↓ | Urine            | 28             | 4              | —  | 32 | 32 | —  | 31 HC                  | LC-MS/MS            | (189) |
| Frizzled-4                          | ↓ | Urine            | 28             | 4              | —  | 32 | 32 | —  | 31 HC                  | LC-MS/MS            | (189) |
| GAPDH                               | ↑ | CSF <sup>d</sup> | 8 <sup>e</sup> | 2 <sup>e</sup> | NR | NR | NR | NR | 12 LETM <sup>f,g</sup> | HR LTQ-Orbitrap MS  | (184) |
| Gelsolin                            | ↑ | CSF <sup>d</sup> | 8 <sup>e</sup> | 2 <sup>e</sup> | NR | NR | NR | NR | 12 LETM <sup>f,g</sup> | HR LTQ-Orbitrap MS  | (184) |
| GFAP                                | ↑ | CSF <sup>d</sup> | 8 <sup>e</sup> | 2 <sup>e</sup> | NR | NR | NR | NR | 12 LETM <sup>f,g</sup> | HR LTQ-Orbitrap MS  | (184) |
| GnTE                                | ↓ | CSF <sup>d</sup> | 8 <sup>e</sup> | 2 <sup>e</sup> | NR | NR | NR | NR | 12 LETM <sup>f,g</sup> | HR LTQ-Orbitrap MS  | (184) |
| Haptoglobin                         | ↑ | CSF <sup>d</sup> | 8 <sup>e</sup> | 2 <sup>e</sup> | NR | NR | NR | NR | 12 LETM <sup>f,g</sup> | HR LTQ-Orbitrap MS  | (184) |
|                                     | ↑ | Serum            | 3              | 3              | 6  | —  | NR | NR | 6 RRMS, 6 HC           | 2-DE & HD-MS/MS     | (185) |
|                                     | ↑ | CSF              | 6              | 3              | 9  | —  | NR | NR | 9 OND                  | 2-DE & MALDI-TOF-MS | (187) |
|                                     | ↑ | CSF              | 4              | 2              | 6  | —  | NR | NR | 6 OND                  | 2-DE & MALDI-TOF-MS | (188) |
| Haptoglobin related protein         | ↑ | CSF <sup>d</sup> | 8 <sup>e</sup> | 2 <sup>e</sup> | NR | NR | NR | NR | 12 LETM <sup>f,g</sup> | HR LTQ-Orbitrap MS  | (184) |
| Hemoglobin                          | ↓ | CSF <sup>d</sup> | 8 <sup>e</sup> | 2 <sup>e</sup> | NR | NR | NR | NR | 12 LETM <sup>f,g</sup> | HR LTQ-Orbitrap MS  | (184) |
| HSPG                                | ↓ | CSF <sup>d</sup> | 8 <sup>e</sup> | 2 <sup>e</sup> | NR | NR | NR | NR | 12 LETM <sup>f,g</sup> | HR LTQ-Orbitrap MS  | (184) |
| ICAM-2                              | ↓ | Urine            | 28             | 4              | —  | 32 | 32 | —  | 46 RRMS, 31 HC         | LC-MS/MS            | (189) |
| IGFBP7                              | ↓ | Urine            | 28             | 4              | —  | 32 | 32 | —  | 31 HC                  | LC-MS/MS            | (189) |
| IGFALS                              | ↓ | Urine            | 28             | 4              | —  | 32 | 32 | —  | 31 HC                  | LC-MS/MS            | (189) |
| Ig heavy, constant $\alpha$ 1       | ↑ | CSF <sup>d</sup> | 8 <sup>e</sup> | 2 <sup>e</sup> | NR | NR | NR | NR | 12 LETM <sup>f,g</sup> | HR LTQ-Orbitrap MS  | (184) |
| Ig heavy, constant $\alpha$ 2       | ↑ | CSF <sup>d</sup> | 8 <sup>e</sup> | 2 <sup>e</sup> | NR | NR | NR | NR | 12 LETM <sup>f,g</sup> | HR LTQ-Orbitrap MS  | (184) |
| Ig heavy, variable 3                | ↑ | CSF <sup>d</sup> | 8 <sup>e</sup> | 2 <sup>e</sup> | NR | NR | NR | NR | 12 LETM <sup>f,g</sup> | HR LTQ-Orbitrap MS  | (184) |
| Ig heavy, constant $\gamma$ 1       | ↑ | CSF <sup>d</sup> | 8 <sup>e</sup> | 2 <sup>e</sup> | NR | NR | NR | NR | 12 LETM <sup>f,g</sup> | HR LTQ-Orbitrap MS  | (184) |
| Ig heavy, constant $\gamma$ 2       | ↑ | CSF <sup>d</sup> | 8 <sup>e</sup> | 2 <sup>e</sup> | NR | NR | NR | NR | 12 LETM <sup>f,g</sup> | HR LTQ-Orbitrap MS  | (184) |
| Ig heavy, constant $\gamma$ 3       | ↑ | CSF              | 6              | 3              | 9  | —  | NR | NR | 9 OND                  | 2-DE & MALDI-TOF-MS | (187) |
|                                     | ↑ | Urine            | 28             | 4              | —  | 32 | 32 | —  | 46 RRMS, 31 HC         | LC-MS/MS            | (189) |
| Ig heavy, constant $\mu$            | ↑ | CSF <sup>d</sup> | 8 <sup>e</sup> | 2 <sup>e</sup> | NR | NR | NR | NR | 12 LETM <sup>f,g</sup> | HR LTQ-Orbitrap MS  | (184) |
| IgG F <sub>c</sub> binding protein  | ↑ | CSF <sup>d</sup> | 8 <sup>e</sup> | 2 <sup>e</sup> | NR | NR | NR | NR | 12 LETM <sup>f,g</sup> | HR LTQ-Orbitrap MS  | (184) |
| Ig $\kappa$ , constant              | ↑ | CSF <sup>d</sup> | 8 <sup>e</sup> | 2 <sup>e</sup> | NR | NR | NR | NR | 12 LETM <sup>f,g</sup> | HR LTQ-Orbitrap MS  | (184) |
|                                     | ↑ | CSF              | 6              | 3              | 9  | —  | NR | NR | 9 OND                  | 2-DE & MALDI-TOF-MS | (187) |
| Ig $\kappa$ , variable 1            | ↑ | CSF <sup>d</sup> | 8 <sup>e</sup> | 2 <sup>e</sup> | NR | NR | NR | NR | 12 LETM <sup>f,g</sup> | HR LTQ-Orbitrap MS  | (184) |
| Ig $\kappa$ , variable 3            | ↑ | CSF <sup>d</sup> | 8 <sup>e</sup> | 2 <sup>e</sup> | NR | NR | NR | NR | 12 LETM <sup>f,g</sup> | HR LTQ-Orbitrap MS  | (184) |
|                                     | ↑ | Urine            | 28             | 4              | —  | 32 | 32 | —  | 31 HC                  | LC-MS/MS            | (189) |
| Ig $\kappa$ , variable 4            | ↑ | CSF <sup>d</sup> | 8 <sup>e</sup> | 2 <sup>e</sup> | NR | NR | NR | NR | 12 LETM <sup>f,g</sup> | HR LTQ-Orbitrap MS  | (184) |
| Ig $\lambda$                        | ↓ | Serum            | 3              | 3              | 6  | —  | NR | NR | 6 RRMS                 | 2-DE & HD-MS/MS     | (185) |
| Ig $\lambda$ , constant 2           | ↑ | CSF <sup>d</sup> | 8 <sup>e</sup> | 2 <sup>e</sup> | NR | NR | NR | NR | 12 LETM <sup>f,g</sup> | HR LTQ-Orbitrap MS  | (184) |
|                                     | ↑ | Urine            | 28             | 4              | —  | 32 | 32 | —  | 31 HC                  | LC-MS/MS            | (189) |
| Ig $\lambda$ -like polypeptide 5    | ↑ | CSF <sup>d</sup> | 8 <sup>e</sup> | 2 <sup>e</sup> | NR | NR | NR | NR | 12 LETM <sup>f,g</sup> | HR LTQ-Orbitrap MS  | (184) |
| Ig $\lambda$ , variable 3           | ↑ | CSF <sup>d</sup> | 8 <sup>e</sup> | 2 <sup>e</sup> | NR | NR | NR | NR | 12 LETM <sup>f,g</sup> | HR LTQ-Orbitrap MS  | (184) |
| Integral membrane protein           | ↓ | Urine            | 28             | 4              | —  | 32 | 32 | —  | 31 HC                  | LC-MS/MS            | (189) |
| Inter- $\alpha$ -trypsin inhibitors | ↑ | CSF <sup>d</sup> | 8 <sup>e</sup> | 2 <sup>e</sup> | NR | NR | NR | NR | 12 LETM <sup>f,g</sup> | HR LTQ-Orbitrap MS  | (184) |
| Interleukin-10 receptor $\beta$     | ↓ | Urine            | 28             | 4              | —  | 32 | 32 | —  | 31 HC                  | LC-MS/MS            | (189) |

|                             |   |                  |                |                |    |    |    |    |                        |                     |       |
|-----------------------------|---|------------------|----------------|----------------|----|----|----|----|------------------------|---------------------|-------|
| JAML                        | ↓ | Urine            | 28             | 4              | —  | 32 | 32 | —  | 31 HC                  | LC-MS/MS            | (189) |
| Kallikrein-1                | ↓ | Urine            | 28             | 4              | —  | 32 | 32 | —  | 31 HC                  | LC-MS/MS            | (189) |
| Kallistatin                 | ↓ | CSF <sup>d</sup> | 8 <sup>e</sup> | 2 <sup>e</sup> | NR | NR | NR | NR | 12 LETM <sup>f,g</sup> | HR LTQ-Orbitrap MS  | (184) |
| Keratin 1                   | ↑ | CSF              | 3              | 3              | 6  | —  | NR | NR | 6 RRMS, 6 HC           | 2-DE & HD-MS/MS     | (186) |
|                             | ↓ | CSF <sup>d</sup> | 8 <sup>e</sup> | 2 <sup>e</sup> | NR | NR | NR | NR | 12 LETM <sup>f,g</sup> | HR LTQ-Orbitrap MS  | (184) |
| Keratin 2E                  | ↓ | CSF <sup>d</sup> | 8 <sup>e</sup> | 2 <sup>e</sup> | NR | NR | NR | NR | 12 LETM <sup>f,g</sup> | HR LTQ-Orbitrap MS  | (184) |
| Keratin 5                   | ↓ | CSF <sup>d</sup> | 8 <sup>e</sup> | 2 <sup>e</sup> | NR | NR | NR | NR | 12 LETM <sup>f,g</sup> | HR LTQ-Orbitrap MS  | (184) |
| Keratin 6C                  | ↓ | CSF <sup>d</sup> | 8 <sup>e</sup> | 2 <sup>e</sup> | NR | NR | NR | NR | 12 LETM <sup>f,g</sup> | HR LTQ-Orbitrap MS  | (184) |
| Keratin 9                   | ↓ | CSF <sup>d</sup> | 8 <sup>e</sup> | 2 <sup>e</sup> | NR | NR | NR | NR | 12 LETM <sup>f,g</sup> | HR LTQ-Orbitrap MS  | (184) |
|                             | ↑ | CSF              | 3              | 3              | 6  | —  | NR | NR | 6 HC                   | 2-DE & HD-MS/MS     | (186) |
| Keratin 10                  | ↓ | CSF <sup>d</sup> | 8 <sup>e</sup> | 2 <sup>e</sup> | NR | NR | NR | NR | 12 LETM <sup>f,g</sup> | HR LTQ-Orbitrap MS  | (184) |
| Keratin 83                  | ↓ | Serum            | 3              | 3              | 6  | —  | NR | NR | 6 RRMS                 | 2-DE & HD-MS/MS     | (185) |
| L-lactate dehydrogenase B   | ↑ | CSF <sup>d</sup> | 8 <sup>e</sup> | 2 <sup>e</sup> | NR | NR | NR | NR | 12 LETM <sup>f,g</sup> | HR LTQ-Orbitrap MS  | (184) |
| Laminin γ1                  | ↓ | Urine            | 28             | 4              | —  | 32 | 32 | —  | 31 HC                  | LC-MS/MS            | (189) |
| Mimecan                     | ↓ | CSF <sup>d</sup> | 8 <sup>e</sup> | 2 <sup>e</sup> | NR | NR | NR | NR | 12 LETM <sup>f,g</sup> | HR LTQ-Orbitrap MS  | (184) |
| NCAM-1                      | ↓ | CSF <sup>d</sup> | 8 <sup>e</sup> | 2 <sup>e</sup> | NR | NR | NR | NR | 12 LETM <sup>f,g</sup> | HR LTQ-Orbitrap MS  | (184) |
| NCAM-2                      | ↓ | CSF <sup>d</sup> | 8 <sup>e</sup> | 2 <sup>e</sup> | NR | NR | NR | NR | 12 LETM <sup>f,g</sup> | HR LTQ-Orbitrap MS  | (184) |
| Neogenin                    | ↓ | CSF <sup>d</sup> | 8 <sup>e</sup> | 2 <sup>e</sup> | NR | NR | NR | NR | 12 LETM <sup>f,g</sup> | HR LTQ-Orbitrap MS  | (184) |
| Neurofascin                 | ↓ | CSF <sup>d</sup> | 8 <sup>e</sup> | 2 <sup>e</sup> | NR | NR | NR | NR | 12 LETM <sup>f,g</sup> | HR LTQ-Orbitrap MS  | (184) |
| Neurofilament               | ↑ | CSF              | 6              | 3              | 9  | —  | NR | NR | 9 OND                  | 2-DE & MALDI-TOF-MS | (187) |
|                             | ↑ | CSF              | 4              | 2              | 6  | —  | NR | NR | 6 OND                  | 2-DE & MALDI-TOF-MS | (188) |
| Neuronal growth factor 1    | ↓ | Urine            | 28             | 4              | —  | 32 | 32 | —  | 31 HC                  | LC-MS/MS            | (189) |
| Neuronal pentraxin 1        | ↓ | CSF <sup>d</sup> | 8 <sup>e</sup> | 2 <sup>e</sup> | NR | NR | NR | NR | 12 LETM <sup>f,g</sup> | HR LTQ-Orbitrap MS  | (184) |
| Neuronal pentraxin receptor | ↓ | CSF <sup>d</sup> | 8 <sup>e</sup> | 2 <sup>e</sup> | NR | NR | NR | NR | 12 LETM <sup>f,g</sup> | HR LTQ-Orbitrap MS  | (184) |
| Neurotrimin                 | ↓ | Urine            | 28             | 4              | —  | 32 | 32 | —  | 31 HC                  | LC-MS/MS            | (189) |
| Nidogen-2                   | ↓ | CSF <sup>d</sup> | 8 <sup>e</sup> | 2 <sup>e</sup> | NR | NR | NR | NR | 12 LETM <sup>f,g</sup> | HR LTQ-Orbitrap MS  | (184) |
| OPCML                       | ↓ | Urine            | 28             | 4              | —  | 32 | 32 | —  | 31 HC                  | LC-MS/MS            | (189) |
| PAM                         | ↓ | CSF <sup>d</sup> | 8 <sup>e</sup> | 2 <sup>e</sup> | NR | NR | NR | NR | 12 LETM <sup>f,g</sup> | HR LTQ-Orbitrap MS  | (184) |
| PEDF                        | ↓ | CSF <sup>d</sup> | 8 <sup>e</sup> | 2 <sup>e</sup> | NR | NR | NR | NR | 12 LETM <sup>f,g</sup> | HR LTQ-Orbitrap MS  | (184) |
|                             | ↓ | CSF              | 6              | 3              | 9  | —  | NR | NR | 9 OND                  | 2-DE & MALDI-TOF-MS | (187) |
|                             | ↓ | CSF              | 4              | 2              | 6  | —  | NR | NR | 6 OND                  | 2-DE & MALDI-TOF-MS | (188) |
| Plasminogen                 | ↑ | CSF <sup>d</sup> | 8 <sup>e</sup> | 2 <sup>e</sup> | NR | NR | NR | NR | 12 LETM <sup>f,g</sup> | HR LTQ-Orbitrap MS  | (184) |
| Pre-albumin                 | ↓ | CSF              | 3              | 3              | 6  | —  | NR | NR | 6 RRMS                 | 2-DE & HD-MS/MS     | (186) |
| Pregnancy zone protein      | ↑ | CSF <sup>d</sup> | 8 <sup>e</sup> | 2 <sup>e</sup> | NR | NR | NR | NR | 12 LETM <sup>f,g</sup> | HR LTQ-Orbitrap MS  | (184) |
| Pro-LRP1                    | ↑ | CSF <sup>d</sup> | 8 <sup>e</sup> | 2 <sup>e</sup> | NR | NR | NR | NR | 12 LETM <sup>f,g</sup> | HR LTQ-Orbitrap MS  | (184) |
| Prosaposin                  | ↓ | Urine            | 28             | 4              | —  | 32 | 32 | —  | 46 RRMS                | LC-MS/MS            | (189) |
| Prostaglandin-D H2          | ↓ | CSF <sup>d</sup> | 8 <sup>e</sup> | 2 <sup>e</sup> | NR | NR | NR | NR | 12 LETM <sup>f,g</sup> | HR LTQ-Orbitrap MS  | (184) |
| Protocadherin-16            | ↓ | Urine            | 28             | 4              | —  | 32 | 32 | —  | 31 HC                  | LC-MS/MS            | (189) |
| PTPRS                       | ↓ | Urine            | 28             | 4              | —  | 32 | 32 | —  | 31 HC                  | LC-MS/MS            | (189) |
| QPCT                        | ↓ | Urine            | 28             | 4              | —  | 32 | 32 | —  | 31 HC                  | LC-MS/MS            | (189) |
| Retinol binding protein 4   | ↓ | CSF <sup>d</sup> | 8 <sup>e</sup> | 2 <sup>e</sup> | NR | NR | NR | NR | 12 LETM <sup>f,g</sup> | HR LTQ-Orbitrap MS  | (184) |
| Secretogranin-1             | ↓ | CSF <sup>d</sup> | 8 <sup>e</sup> | 2 <sup>e</sup> | NR | NR | NR | NR | 12 LETM <sup>f,g</sup> | HR LTQ-Orbitrap MS  | (184) |
| Serotransferrin             | ↓ | CSF <sup>d</sup> | 8 <sup>e</sup> | 2 <sup>e</sup> | NR | NR | NR | NR | 12 LETM <sup>f,g</sup> | HR LTQ-Orbitrap MS  | (184) |
| SPARC-like protein 1        | ↓ | CSF <sup>d</sup> | 8 <sup>e</sup> | 2 <sup>e</sup> | NR | NR | NR | NR | 12 LETM <sup>f,g</sup> | HR LTQ-Orbitrap MS  | (184) |
| Tenascin-X                  | ↓ | CSF <sup>d</sup> | 8 <sup>e</sup> | 2 <sup>e</sup> | NR | NR | NR | NR | 12 LETM <sup>f,g</sup> | HR LTQ-Orbitrap MS  | (184) |
| Transferrin                 | ↑ | CSF              | 3              | 3              | 6  | —  | NR | NR | 6 HC                   | 2-DE & HD-MS/MS     | (186) |
| TREM 132A                   | ↓ | CSF <sup>d</sup> | 8 <sup>e</sup> | 2 <sup>e</sup> | NR | NR | NR | NR | 12 LETM <sup>f,g</sup> | HR LTQ-Orbitrap MS  | (184) |
| Transthyretin               | ↓ | CSF <sup>d</sup> | 8 <sup>e</sup> | 2 <sup>e</sup> | NR | NR | NR | NR | 12 LETM <sup>f,g</sup> | HR LTQ-Orbitrap MS  | (184) |
|                             | ↓ | CSF              | 6              | 3              | 9  | —  | NR | NR | 9 OND                  | 2-DE & MALDI-TOF-MS | (187) |
|                             | ↓ | CSF              | 4              | 2              | 6  | —  | NR | NR | 6 OND                  | 2-DE & MALDI-TOF-MS | (188) |
| Ubiquitin                   | ↓ | Urine            | 28             | 4              | —  | 32 | 32 | —  | 31 HC                  | LC-MS/MS            | (189) |
| Vitamin D binding protein   | ↓ | CSF              | 6              | 3              | 9  | —  | NR | NR | 9 OND                  | 2-DE & MALDI-TOF-MS | (187) |

---

2-DE, two dimensional gel electrophoresis; AEBP1, adipocyte enhancer binding protein 1; C4BP $\alpha$ , C4b-binding protein alpha chain; CACNA2D2, voltage-dependent calcium channel subunit alpha-2/delta-1; CHL1, neural cell adhesion molecule L1-like; CHMP5, chromatin-modifying protein 5; CSF, cerebrospinal fluid; 3DKK3, Dickkopf-related protein 3; FAM3C, family with sequence similarity 3 member C; FGFR1, fibroblast growth factor receptor 1; Gal3BP, galectin-3-binding protein; GAPDH, glyceraldehyde-3-phosphate dehydrogenase; GFAP, glial fibrillary acidic protein; GnTE, N-acetyllactosaminide beta-1,3-N-acetylglucosaminyltransferase; HC, healthy controls; HD-MS/MS, high definition tandem mass spectrometry; HR LTQ-Orbitrap MS, high resolution hybrid linear ion trap quadrupole-orbitrap mass spectrometry; HSPG, basement membrane-specific heparin sulfate proteoglycan core protein; ICAM-2, intercellular adhesion molecule 2; IGFBP7, insulin-like growth factor-binding protein 7; IGFBP5, insulin-like growth factor-binding protein complex acid labile subunit; Ig, immunoglobulin; JAML, junctional adhesion molecule-like; LC-MS, liquid chromatography-tandem mass spectrometry; LETM, longitudinally extensive transverse myelitis; MALDI-TOF-MS, matrix-assisted laser desorption ionization time of flight mass spectrometry; neuronal pentraxin receptor; NCAM, neural cell adhesion molecule 1 & 2; NMOSD, neuromyelitis optica spectrum disorder; NR, not reported; OPCML, opioid-binding protein/cell adhesion molecule; OND, other neurological disorders, e.g., migraines, tension-type headaches, drug-induced delirium, normal pressure hydrocephalus, or trigeminal neuralgia diseases; PAM, peptidyl-glycine alpha-amidating monooxygenase; PEDF, pigment epithelium-derived factor; Pro-LRP1, pro low-density lipoprotein receptor-related protein 1; PTPRS, receptor-type tyrosine-protein phosphatase S; QPCT, glutamyl-peptide cyclotransferase; RRMS, relapsing-remitting multiple sclerosis; TREM, transmembrane protein 132.

<sup>a</sup>NMOSD status at the time of biopsy sampling.

<sup>b</sup>NMOSD samples are statistically different from each comparison group.

<sup>c</sup>Method of metabolomic spectra data acquisition.

<sup>d</sup>Proteomic analysis was performed using CSF exosomes.

<sup>e</sup>Five NMOSD CSF biopsies, with the highest MCP-1 and IP-10, were pooled prior to analysis.

<sup>f</sup>Six LETM CSF biopsies, with the highest MCP-1 & IP-10, were pooled prior to analysis.

<sup>g</sup>NMOSD Patients are AQP4<sup>+</sup> and MOG<sup>+</sup>.

<sup>h</sup>T2 weighted hyperintense lesions, >3 vertebral segments, spinal cord MRI.

---
